# Supplementary material for: Azetidinyl Malachite Green: a superior fluorogen-activating protein probe for live-cell and dynamic SIM imaging
Source: Royal Society of Chemistry journal article supplement (doi:10.1039/d5sc01150g), 2025-01-01
Supplement: d5sc01150g1.pdf [file d5sc01150g1.pdf]

## SUPPLEMENTARY INFORMATION

### Azetidinyl Malachite Green: a Superior Fluorogen-Activating Protein Probe for Live-cell and Dynamic SIM Imaging

Fei Deng,<sup>‡ abc</sup> Xiangning Fang,<sup>‡ ac</sup> Qinglong Qiao,<sup>\* a</sup> Guoli Han,<sup>ac</sup> Lu Miao,<sup>a</sup> Shuangshuang Long<sup>ad</sup> and Zhaochao Xu<sup>\* ac</sup>

<sup>a</sup>CAS Key Laboratory of Separation Science for Analytical Chemistry, Dalian Institute of Chemical Physics, Chinese Academy of Sciences, Dalian 116023, China.

<sup>b</sup>School of Chemistry and Chemical Engineering, Jinggangshan University, Ji'an, Jiangxi 343009, China.

<sup>c</sup>Key Laboratory of Jiangxi Province for Special Optoelectronic Artificial Crystal Materials, Ji'an, Jiangxi 343009, China.

<sup>d</sup>School of Chemistry and Chemical Engineering, University of South China, Hengyang, Hunan 421001, China.

<sup>e</sup>University of Chinese Academy of Sciences, Beijing 100049, China.

<sup>‡</sup> These two authors contributed equally.

<sup>\*</sup>Corresponding authors

E-mail addresses: [qqqiao@dicp.ac.cn](mailto:qqqiao@dicp.ac.cn) (Q. Qiao), [zcxu@dicp.ac.cn](mailto:zcxu@dicp.ac.cn) (Z. Xu)

# Table of Contents

|                                                                            |           |
|----------------------------------------------------------------------------|-----------|
| <b>1 Materials and instruments .....</b>                                   | <b>3</b>  |
| <b>2 Synthesis of MGs .....</b>                                            | <b>3</b>  |
| <b>3 Experimental Procedures .....</b>                                     | <b>4</b>  |
| 3.1 Expression and purification of dL5** .....                             | 4         |
| 3.2 Spectral measurements .....                                            | 5         |
| 3.3 Determination of $\Phi$ and $K_d$ .....                                | 5         |
| 3.4 Quantum chemical calculations .....                                    | 5         |
| 3.5 Molecular docking .....                                                | 5         |
| 3.6 Cell cultures and imaging experiments .....                            | 5         |
| <b>4 Results and Discussion .....</b>                                      | <b>6</b>  |
| 4.1 Characterization of dL5** .....                                        | 6         |
| 4.2 Spectroscopic characterizations of MGs and MGs/dL5** .....             | 7         |
| 4.3 Binding affinity of MGs to dL5** .....                                 | 7         |
| 4.4 Photostability of MG1/dL5** and MG3/dL5** in confocal microscopy ..... | 7         |
| 4.5 Results of quantum chemical calculations .....                         | 8         |
| 4.5.1 Geometry optimization .....                                          | 8         |
| 4.5.2 Major MO transitions in excited states .....                         | 14        |
| 4.5.3 Spectra calculation .....                                            | 18        |
| <b>5 Characterization of compounds .....</b>                               | <b>19</b> |
| <b>6 References .....</b>                                                  | <b>32</b> |

## 1 Materials and instruments

Unless otherwise stated, all reagents and solvents for synthesis and detection were purchased from commercial suppliers (J&K, Adamas, Innochem, and Aladdin) and used without further purification. All water used was from Millipore water purification system with a minimum resistivity of 18.0 M $\Omega$ ·cm. The plasmids pET21-10XHis-GST-HRV-dL5 (bacterial expression vector for dL5\*\*), pcDNA3.1-NLS-myc-dL5-2xG4S-mCER3 (expresses myc-dL5\*\*-mCER3 fusion protein in nuclei), pcDNA3.1-COXIV-COX8-dL5-2XG4S-mCER3 (expresses dL5\*\*-mCER3 fusion protein in mitochondria) and pcDNA3.1-kappa-myc-dL5-2XG4S-mCER3-KDEL (expresses myc-dL5\*\*-mCER3 fusion protein in endoplasmic reticulum) were obtained from Addgene.

<sup>1</sup>H NMR and <sup>13</sup>C NMR spectra were recorded on Bruker 400 spectrometer. Mass spectrometry data were obtained with Agilent 6540 LC/QTOF and AB SCIEX MALDI-TOF/TOF 5800. UV-Vis absorption spectra were collected on Agilent Cary 60 UV-Vis Spectrophotometer. Fluorescence measurements were performed on Agilent CARY Eclipse and HORIBA FluoroMax-4 fluorescence spectrophotometers. Confocal images were performed on Laser Scanning Confocal Microscope (Andor iQ 3.2) with 100 $\times$ oil-immersion objective lens. Structured illumination microscopy (SIM) super-resolution images were taken on a Nikon N-SIM system with a 100 $\times$ oil immersion objective lens, 1.49 NA (Nikon). Images were captured using Nikon NISElements and reconstructed using slice reconstruction in NIS-elements.

## 2 Synthesis of MGs

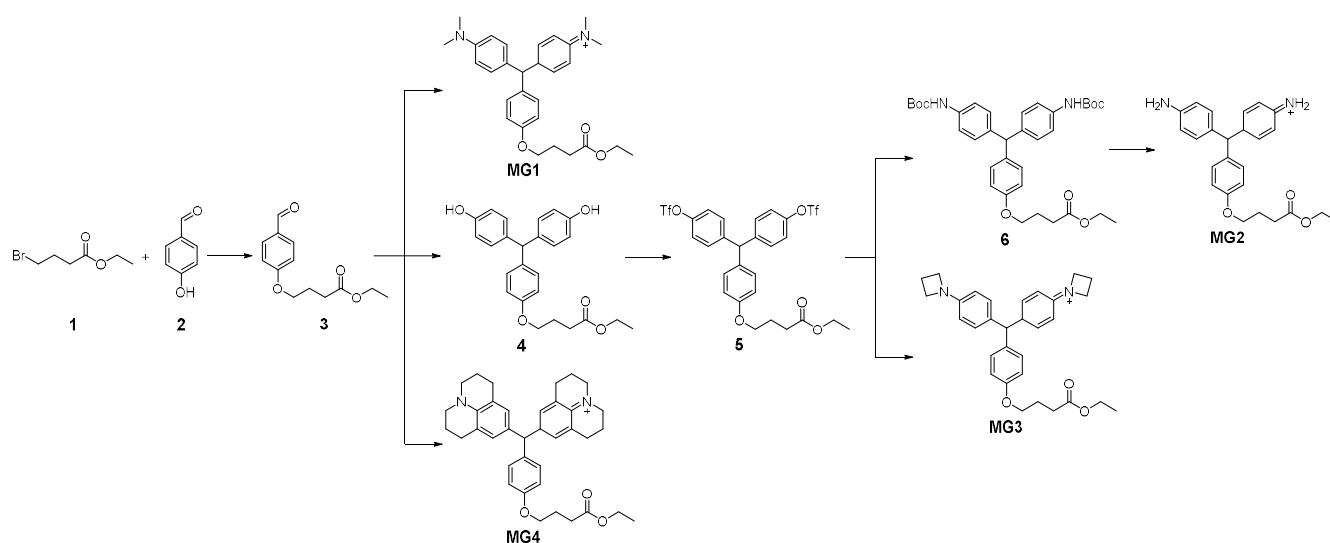

Scheme S1. Synthesis of MG1-4

**Compound 3.** This compound was synthesized according to a previously reported procedure.<sup>1</sup> <sup>1</sup>H NMR (400 MHz, CDCl<sub>3</sub>)  $\delta$  9.88 (s, 1H), 7.83 (d,  $J$  = 8.7 Hz, 2H), 6.99 (d,  $J$  = 8.7 Hz, 2H), 4.31 – 3.99 (m, 4H), 2.53 (t,  $J$  = 7.2 Hz, 2H), 2.25 – 2.09 (m, 2H), 1.26 (t,  $J$  = 7.1 Hz, 3H).

**MG1.** This compound was synthesized according to a previously reported procedure.<sup>2</sup> <sup>1</sup>H NMR (400 MHz, CD<sub>3</sub>CN)  $\delta$  7.33 (dd,  $J$  = 22.2, 8.6 Hz, 6H), 7.11 (d,  $J$  = 8.0 Hz, 2H), 6.95 (d,  $J$  = 8.9 Hz, 4H), 4.28 – 3.97 (m, 4H), 3.26 (s, 12H), 2.50 (t,  $J$  = 7.2 Hz, 2H), 2.10 (t,  $J$  = 6.7 Hz, 2H), 1.23 (t,  $J$  = 7.1 Hz, 3H).

**Compound 4.** Compound **3** (1.1 g; 5 mmol), phenol (1.88 g, 20 mmol) and *p*-toluenesulfonic acid monohydrate (95 mg, 0.5 mmol) were dissolved in 20 mL toluene. The reaction mixture was stirred at 60 °C for 20 h. After cooling to room temperature, the reaction mixture was concentrated under reduced pressure. The residue was purified by column chromatography on silica gel to afford the desired compound (1.32 g, 65%). <sup>1</sup>H NMR (400 MHz, CDCl<sub>3</sub>)  $\delta$  6.90 (dd,  $J$  = 23.4, 8.2 Hz, 6H), 6.71 (dd,  $J$  = 15.1, 8.2 Hz, 6H), 6.35 (s, 2H), 5.24 (s, 1H), 4.12 (q,  $J$  = 7.1 Hz, 2H), 3.91 (t,  $J$  = 6.0 Hz, 2H), 2.49 (t,  $J$  = 7.3 Hz, 2H), 2.05 (p,  $J$  = 6.7 Hz, 2H), 1.21 (t,  $J$  = 7.1 Hz, 3H). <sup>13</sup>C NMR (100 MHz, CDCl<sub>3</sub>)  $\delta$  174.50, 157.02, 153.96, 137.06, 136.72, 130.41, 130.27, 115.21, 114.28, 66.78, 61.05, 54.36, 31.09, 24.68, 14.18. HRMS (ESI) calcd. for C<sub>25</sub>H<sub>27</sub>O<sub>5</sub><sup>+</sup> [M+H]<sup>+</sup> 407.1858, found 407.1866.

**Compound 5.** Compound **4** (0.61 g; 1.5 mmol) was dissolved in 20 mL dichloromethane and cooled to 0 °C. After the addition of pyridine (0.95 g; 12 mmol) and Tf<sub>2</sub>O (1.7 g; 6 mmol), the reaction was slowly warmed to room temperature and stirred for another 1 h. The reaction was quenched with water (30 mL) and extracted with dichloromethane (3  $\times$  30 mL). The organic layers were combined and dried over Na<sub>2</sub>SO<sub>4</sub>. After filtration and removal of the solvent under reduced pressure, the residue was purified by column chromatography on silica gel to afford the desired compound (0.95 g, 95%). <sup>1</sup>H NMR (400 MHz, MeOD)  $\delta$  7.37 – 7.21 (m, 8H), 7.00 (d,  $J$  = 8.7 Hz, 2H), 6.87 (d,  $J$  = 8.7 Hz, 2H), 5.67 (s, 1H), 4.11 (q,  $J$  = 7.2 Hz, 2H), 3.98 (t,  $J$  = 6.2 Hz, 2H), 2.48 (t,  $J$  = 7.3 Hz, 2H), 2.14 – 1.92 (m, 2H), 1.22 (t,  $J$  = 7.1 Hz, 3H). <sup>13</sup>C NMR (101 MHz, MeOD)  $\delta$  173.62,

157.89, 148.22, 144.58, 134.47, 130.92, 129.92, 121.04, 120.34, 117.17, 114.33, 66.58, 60.14, 54.30, 30.30, 24.41, 13.10. HRMS (ESI) calcd. for  $C_{27}H_{25}F_6O_9S_2^+$   $[M+H]^+$  671.0844, found 671.0895.

**Compound 6.** Compound **5** (134 mg, 0.2 mmol),  $Pd_2(dba)_3$  (37 mg, 0.04 mmol),  $Cs_2CO_3$  (162 mg, 0.5 mmol), tBuXPhos (25 mg, 0.06 mmol) and tert-Butyl carbamate (56 mg, 0.48 mmol) were added to a 25 mL flask. The flask was sealed and evacuated/backfilled with nitrogen (3 x). Dioxane (2 mL) was added and the mixture was stirred at 100 °C for 18 h. After cooling to room temperature, the reaction mixture was concentrated under reduced pressure. The residue was purified by column chromatography on silica gel to afford the desired compound (70 mg, 58%).  $^1H$  NMR (400 MHz,  $CDCl_3$ )  $\delta$  7.24 (s, 2H), 6.98 (dd,  $J$  = 11.5, 8.6 Hz, 6H), 6.78 (d,  $J$  = 8.7 Hz, 2H), 6.43 (s, 2H), 5.38 (s, 1H), 4.14 (q,  $J$  = 7.1 Hz, 2H), 3.97 (t,  $J$  = 6.1 Hz, 2H), 2.50 (t,  $J$  = 7.3 Hz, 2H), 2.09 (p,  $J$  = 6.7 Hz, 2H), 1.50 (s, 18H), 1.25 (t,  $J$  = 7.1 Hz, 3H).  $^{13}C$  NMR (100 MHz,  $CDCl_3$ )  $\delta$  173.26, 157.24, 152.81, 139.05, 136.45, 136.32, 130.25, 129.81, 118.52, 114.18, 80.44, 66.67, 60.42, 54.70, 30.86, 28.35, 24.70, 14.24.

**MG2.** Compound **6** (70 mg, 0.12 mmol) was dissolved in 2.5 mL dichloromethane and 0.5 mL trifluoroacetic acid was added. The reaction mixture was stirred at room temperature for 12 h. After concentrating under reduced pressure, DDQ and methanol (5 mL) were added and stirred at room temperature for 1 hour. After removal of the solvent under reduced pressure, the residue was purified by column chromatography on silica gel to afford the desired compound (42 mg, 70%).  $^1H$  NMR (400 MHz, MeOD)  $\delta$  7.34 (dd,  $J$  = 15.3, 8.8 Hz, 6H), 7.16 (d,  $J$  = 8.8 Hz, 2H), 6.85 (d,  $J$  = 8.9 Hz, 4H), 4.26 – 4.03 (m, 4H), 2.55 (t,  $J$  = 7.2 Hz, 2H), 2.15 (t,  $J$  = 6.7 Hz, 2H), 1.26 (t,  $J$  = 7.1 Hz, 3H).  $^{13}C$  NMR (100 MHz, MeOD)  $\delta$  179.37, 173.43, 164.27, 159.42, 141.41, 137.49, 131.75, 127.00, 114.83, 114.53, 67.36, 60.23, 30.13, 24.19, 13.12. HRMS (ESI) calcd. for  $C_{25}H_{27}N_2O_3^+$   $[M]^+$  403.2016, found 403.2015.

**MG 3.** Compound **5** (134 mg, 0.2 mmol),  $Pd_2(dba)_3$  (37 mg, 0.04 mmol),  $Cs_2CO_3$  (162 mg, 0.5 mmol) and tBuXPhos (25 mg, 0.06 mmol) were added to a 25 mL flask. The flask was sealed and evacuated/backfilled with nitrogen (3 x). Dioxane (2 mL) and azetidine (27 mg, 0.48 mmol) were added and the mixture was stirred at 100 °C for 18 h. The mixture was subsequently cooled to room temperature and diluted with 10 mL MeOH, then DDQ (90 mg, 0.4 mmol) was added and stirred for 2 h. After filtration and removal of the solvent under reduced pressure, the residue was purified by column chromatography on silica gel to afford the desired compound (45 mg, 43%).  $^1H$  NMR (400 MHz, MeOD)  $\delta$  7.32 (dd,  $J$  = 11.6, 8.9 Hz, 6H), 7.13 (d,  $J$  = 8.8 Hz, 2H), 6.72 – 6.43 (m, 4H), 4.31 (t,  $J$  = 7.6 Hz, 8H), 4.23 – 4.10 (m, 4H), 2.55 (q,  $J$  = 7.7, 7.3 Hz, 6H), 2.19 – 2.09 (m, 2H), 1.25 (t,  $J$  = 7.2 Hz, 3H).  $^{13}C$  NMR (101 MHz, MeOD)  $\delta$  177.63, 173.42, 163.94, 156.04, 140.21, 137.17, 131.92, 126.91, 114.52, 111.01, 67.34, 60.23, 51.44, 30.14, 24.21, 15.55, 13.15. HRMS (ESI) calcd. for  $C_{31}H_{35}N_2O_3^+$   $[M]^+$  483.2642, found 483.2688.

**MG 4.** Compound **3** (236 mg, 1 mmol), julolidine (347 g, 2 mmol) and p-toluenesulfonic acid monohydrate (190 mg, 1 mmol) were dissolved in 10 mL toluene. The reaction mixture were stirred at 100 °C for 12 h. After cooling to room temperature, the reaction mixture was concentrated under reduced pressure. The residue was diluted with 10 mL MeOH, then DDQ (246 mg, 1 mmol) was added and reflux for 2 h. After removal of the solvent under reduced pressure, the residue was purified by column chromatography on silica gel to afford the desired compound (190 mg, 32%).  $^1H$  NMR (400 MHz, MeOD)  $\delta$  7.22 (d,  $J$  = 8.0 Hz, 2H), 7.10 (d,  $J$  = 8.8 Hz, 2H), 6.91 (s, 4H), 4.29 – 4.13 (m, 4H), 3.55 (t,  $J$  = 5.8 Hz, 8H), 2.75 (t,  $J$  = 6.2 Hz, 8H), 2.57 (t,  $J$  = 7.2 Hz, 2H), 2.23 – 2.11 (m, 2H), 2.09 – 1.93 (m, 8H), 1.28 (t,  $J$  = 7.2 Hz, 3H).  $^{13}C$  NMR (101 MHz, MeOD)  $\delta$  175.14, 174.89, 164.52, 152.53, 138.20, 137.96, 133.69, 129.75, 127.90, 126.95, 124.12, 115.62, 68.62, 61.65, 52.00, 31.60, 28.40, 25.66, 21.89, 14.55. HRMS (ESI) calcd. for  $C_{37}H_{43}N_2O_3^+$   $[M]^+$  563.3268, found 563.3271.

### 3 Experimental Procedures

#### 3.1 Expression and purification of dL5\*\*

Competent Cells BL21 (Takara) were transformed with pET21-10XHis-GST-HRV-dL5 and selected for ampicillin resistance yielding E. coli\_dL5\*\*. The fresh colonies were grown in 5 mL LB containing 50  $\mu$ g/mL ampicillin overnight. The 5 mL overnight cultures were then added to 500 mL LB (containing 50  $\mu$ g/mL ampicillin) and culture to an OD of 0.8 at 37°C. The expression of dL5\*\* was induced by the addition of 500  $\mu$ M IPTG and kept at 20°C for 12 h. The cells were centrifuged and resuspended in 20 mL buffer A (20 mM Tris, 500 mM NaCl, 5 mM imidazole pH7.5). The cells were disrupted by sonication at 4°C. This lysate was centrifuged 30 min at 20 000g and the supernatant was incubated with buffer A prewashed Ni-NTA-agarose for 2h at 4°C. After binding, the Ni-NTA-agarose were washed with buffer 60 (same as wash buffer A but with 60 mM imidazole) and eluted with buffer 200 (same as wash buffer A but with 200 mM imidazole) to get His-GST tagged dL5\*\*. The His-GST were cleaved from dL5\*\* through His tagged HRV 3C protease (Takara) at 4°C overnight. Finally, dL5\*\* was purified by column chromatography on Ni-NTA-agarose. Protein concentration was determined using a BCA protein assay kit (Sangon Biotech).

#### 3.2 Spectral measurements

**MGs** were dissolved in DMSO to afford 2 mM stock solutions. The **MGs** were diluted to 0.5  $\mu$ M with PBS buffer solution (pH 7.40) for intrinsic absorbance and fluorescence measurements. The absorbance and fluorescence measurements of **MGs**/dL5\*\* were carried out using 2  $\mu$ M dL5\*\* and 0.5  $\mu$ M **MGs**.

### 3.3 Determination of $\Phi$ and $K_d$

The fluorescence quantum yields ( $\Phi$ ) were determined using Si-rhodamine ( $\Phi = 0.41$  in PBS pH 7.40)<sup>3</sup> as the standard and calculated using the following equation:

$$\Phi_s = \Phi_r \times \frac{A_r F_s n_s^2}{A_s F_r n_r^2}$$

where, the subscripts "s" and "r" stand for sample and reference, respectively. A is the absorbance. F is the integrated fluorescence intensity and n is the refractive index of the solvent.

Binding affinity to dL5\*\* was determined by measuring fluorescence intensity at  $\lambda_{\max}$  under conditions of ligand depletion. 10 nM dL5\*\* were each assayed with a 0 to 500 nM range of **MGs**.  $K_d$  values were determined by non-linear regression using the following equation<sup>2</sup>:

$$F = \frac{c + K_d + R - \sqrt{(c + K_d + R)^2 - 4cR}}{2}$$

where R stand for fluorescence intensity of **MGs**/dL5\*\* complex at the observed or extrapolated plateau.

### 3.4 Quantum chemical calculations

All the quantum chemical calculations were carried out at the ORCA 5.0.0<sup>4-6</sup> program package using density functional theory (DFT) or time-dependent density functional theory (TD-DFT). The ground states geometries of **MGs** were optimized at r<sup>2</sup>SCAN-3c<sup>7</sup> composite method. Single point energies of the optimized structures were further calculated at RI- $\omega$ B97M-V/def2-TZVP level. The excited states were calculated at RI-PBE0/def2-SV(P) level. All the calculations were conducted in conductor-like polarizable continuum model (CPCM) of water. The corresponding molecular orbital composition, absorption were analyzed by Multiwfn<sup>8</sup>. Molecular representations were conducted by VMD<sup>9</sup>.

### 3.5 Molecular docking

The protein structure homology-modelling of dL5\*\* were constructed through SWISS-MODEL<sup>10</sup> using **MG1**-bound L5\* (PDB ID: 4K3H) as the template. Automated docking simulations were conducted with AutoDock Vina<sup>11</sup>. The best conformation of the docking complex was generated based on the scoring functions and visualized via PyMOL<sup>12</sup>.

### 3.6 Cell cultures and imaging experiments

About  $2 \times 10^4$  Hela cells were seeded into confocal dish (35 mm, NEST) and cultured in Dulbecco's modified Eagle's medium (DMEM, Gibco) supplied with 10% fetal bovine serum (FBS, Gibco) under standard culture conditions (atmosphere of 5% CO<sub>2</sub> and 95% air at 37°C) for 48 h. The plasmids pcDNA3.1-NLS-myc-dL5-2xG4S-mCER3, pcDNA3.1-COXIV-COX8-dL5-2XG4S-mCER3 and pcDNA3.1-kappa-myc-dL5-2XG4S-mCER3-KDEL were transfected Hela cells by using Lipofectamine 2000 (Invitrogen) according to the manufacturer's protocol. After the incubation of the cells at 5 % CO<sub>2</sub> 37 °C for 24 h, the cells were then rinsed twice with PBS and incubated with FBS-free DMEM containing **MGs** (200 nM) for 15 min. After incubation, cells were rinsed with PBS twice again for live-cell imaging. For photostability assessment, Hela cells were incubated with 4% paraformaldehyde for 10 min and 0.1% TritonX-100 for 2 min respectively. The fixed Hela cells were rinsed twice with PBS and incubated with PBS containing **MGs** (200 nM) for 15 min. In the experimental group, the cells were imaged directly under continuous 640 nm laser irradiation. In contrast, cells in the control group were imaged after washing excess **MGs** with PBS.

## 4 Results and Discussion

### 4.1 Characterization of dL5\*\*

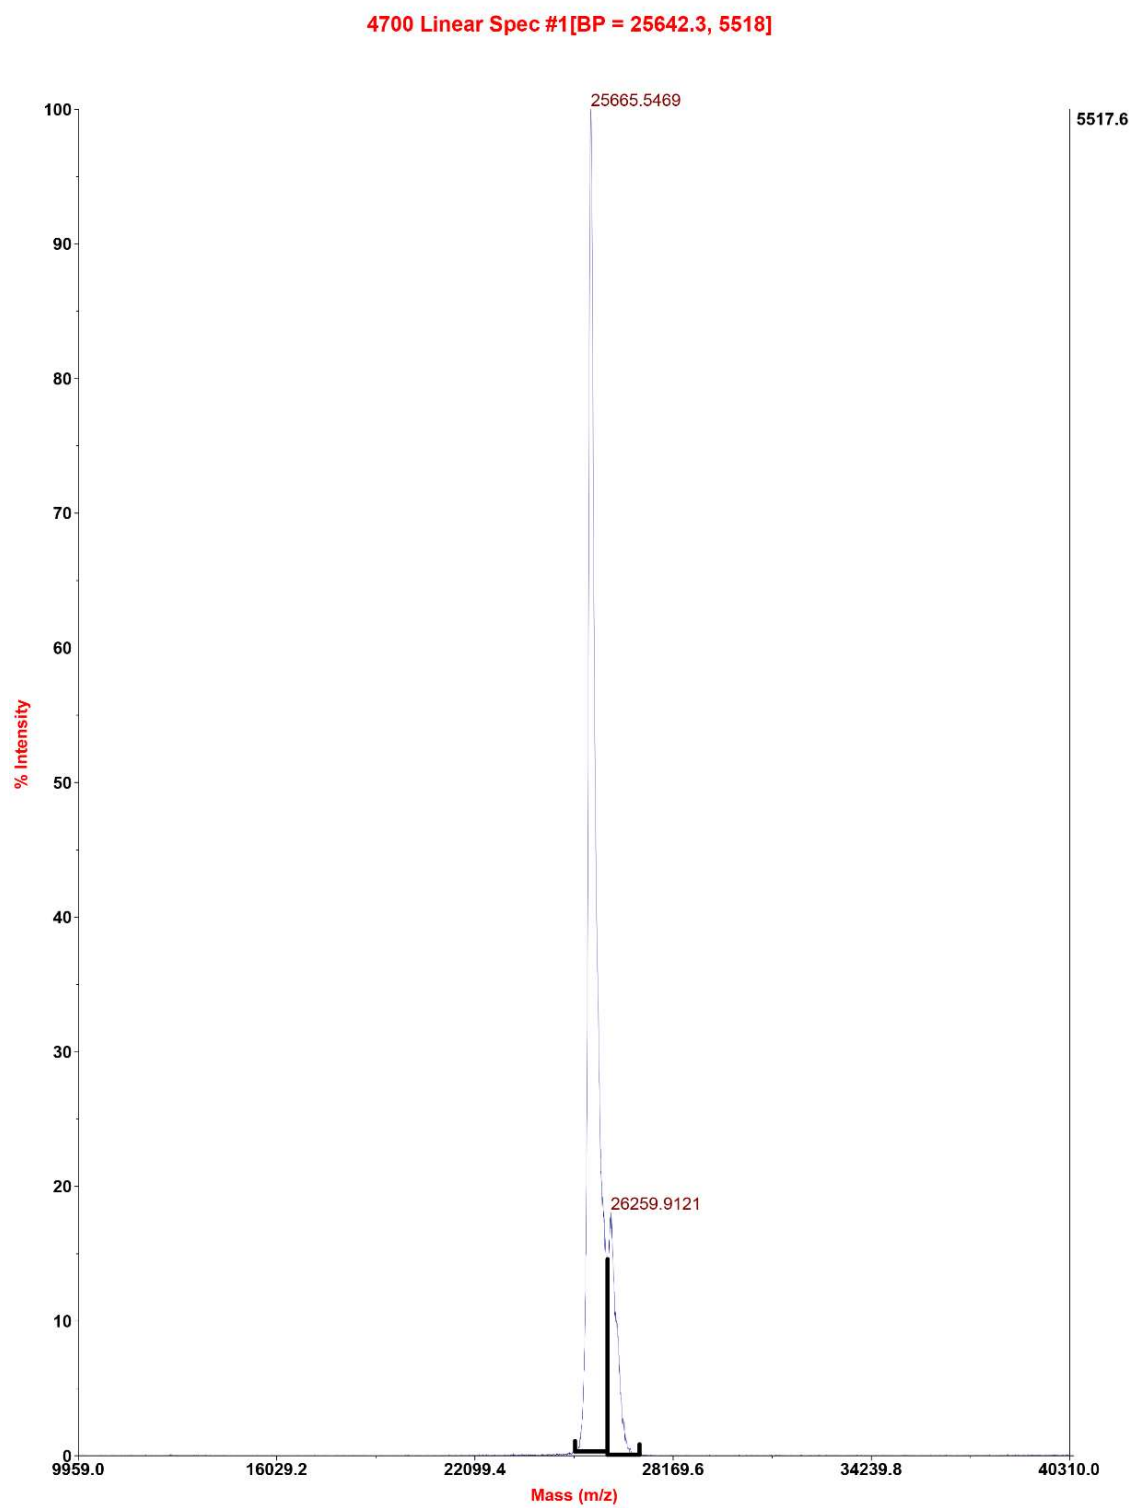

Figure S1. MALDI-TOF-MS data of dL5\*\*

#### 4.2 Spectroscopic characterizations of MGs and MGs/dL5\*\*

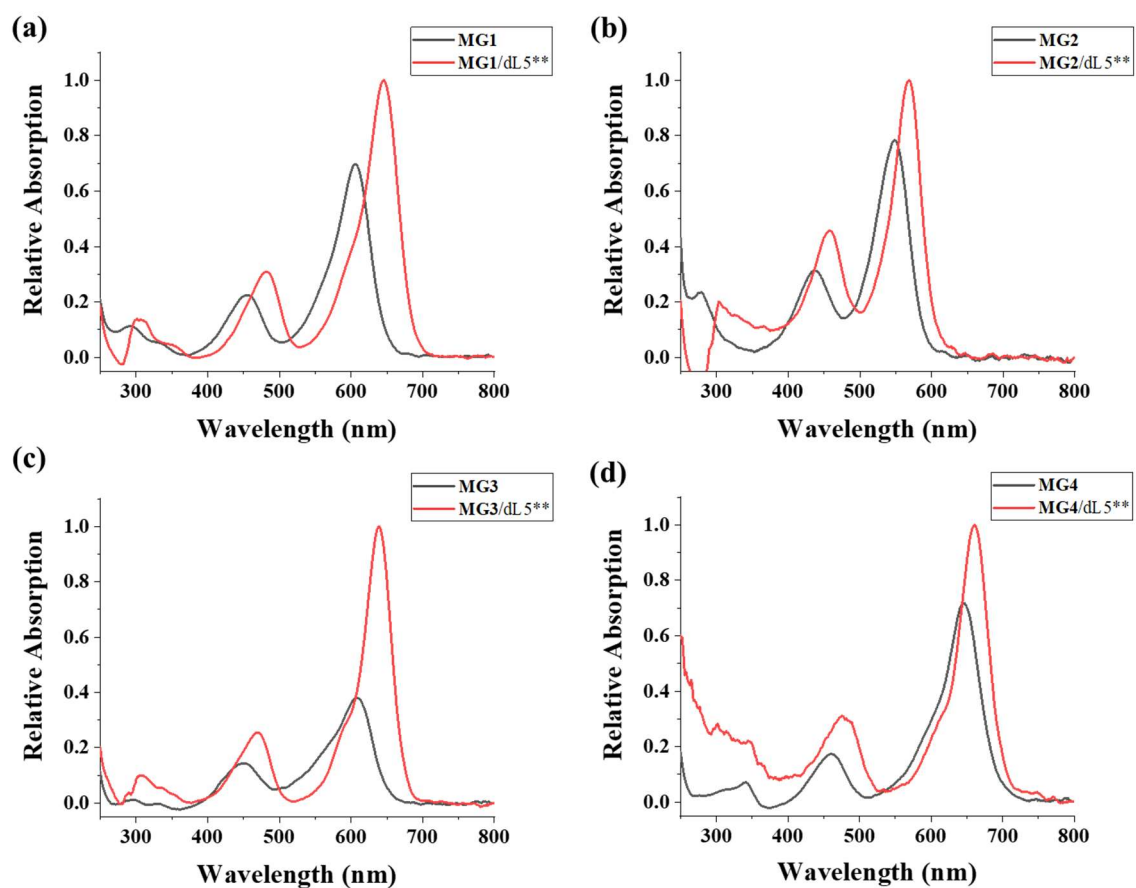

Figure S2. Absorption spectra of MGs and MGs/dL5\*\*.

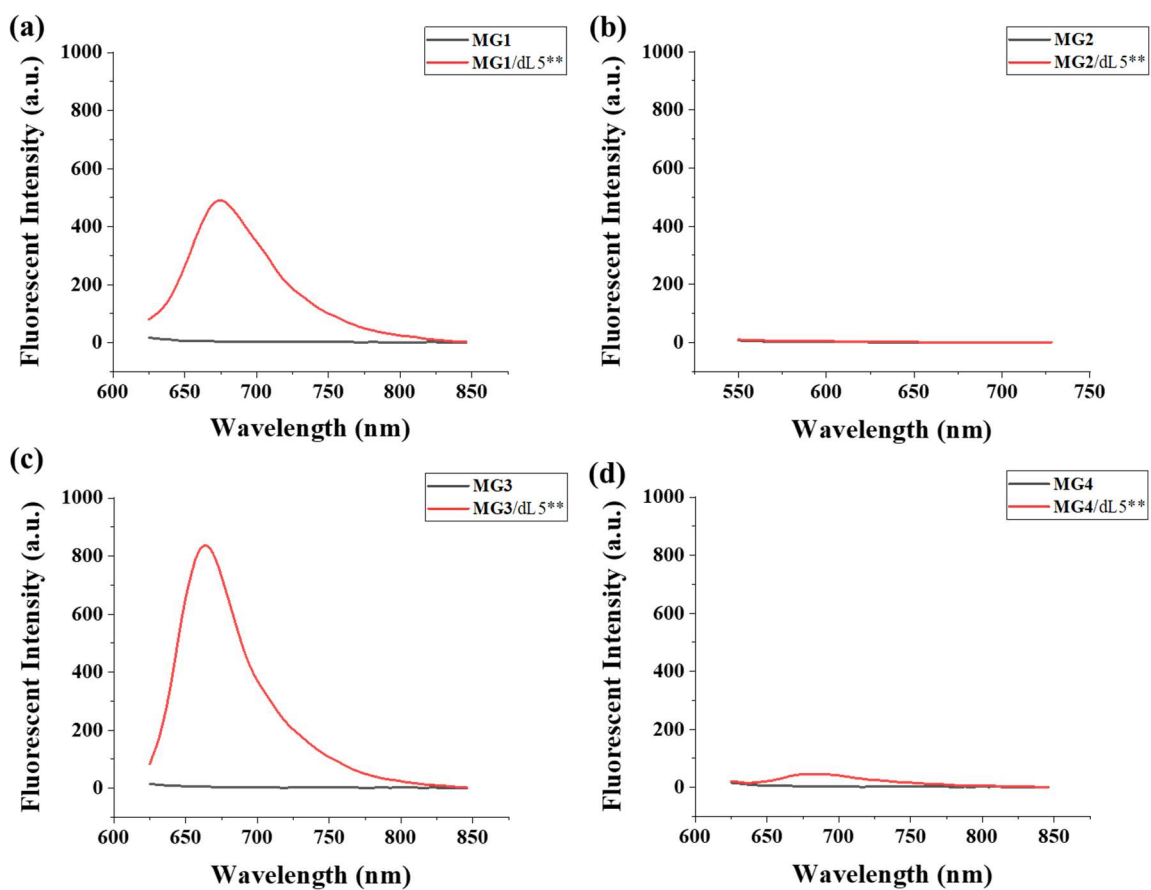

Figure S3. fluorescence spectra of MGs and MGs/dL5\*\*.

Table S1 Correlation between shifts in the absorption maximum and the calculated binding energy.

| Dye        | $\Delta\lambda_{\text{abs}}$ (nm) | Affinities (kcal/mol) |
|------------|-----------------------------------|-----------------------|
| <b>MG1</b> | 40                                | -10.8                 |
| <b>MG2</b> | 20                                | -9.8                  |
| <b>MG3</b> | 32                                | -10.4                 |
| <b>MG4</b> | 15                                | -2.5                  |

#### 4.3 Binding affinity of MGs to dL5\*\*

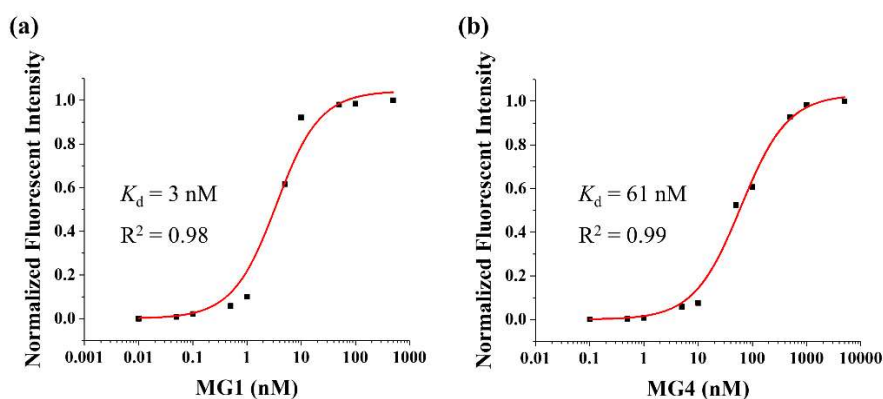

Figure S4. Binding equilibrium analysis of **MG1** and **MG4** to dL5\*\*.

#### 4.4 Photostability of MG1/dL5\*\* and MG3/dL5\*\* in confocal microscopy

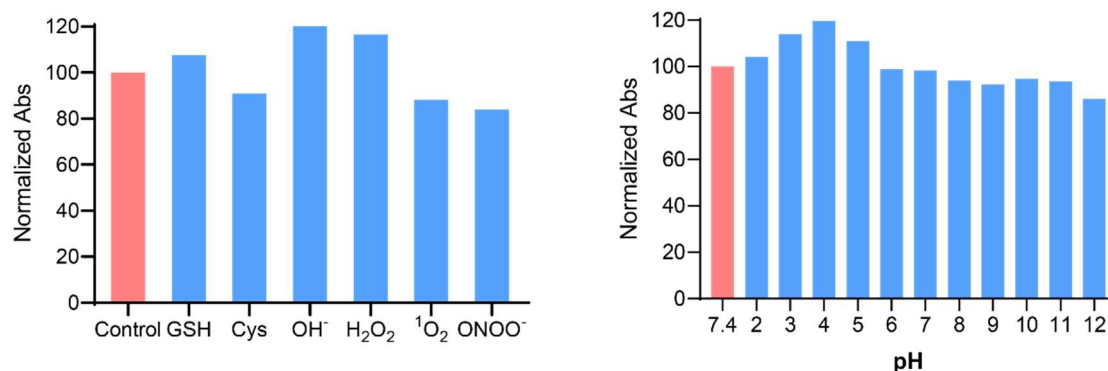

Figure S5. The stability of MG3 in the presence of different biological interferences and in various pH values. The stability of **MG3** was evaluated in the presence of reactive oxygen species (ROS) (10  $\mu$ M <sup>1</sup>O<sub>2</sub>, 100 mM OH<sup>-</sup>), reactive nitrogen species (RNS) (10  $\mu$ M ONOO<sup>-</sup>), and reactive sulfur species (RSS) (100 mM GSH, 200  $\mu$ M Cys). The selected concentrations of these biological interferences are significantly higher than typical physiological levels, providing further insights into the molecule's stability in live cells. We assessed the absorbance of **MG3** at 607 nm to evaluate its stability in the presence of these different biological interferences. The results indicated that **MG3** exhibited negligible absorbance changed in the presence of different biological interferences (Figure S5a). We also tested the absorbance of **MG3** across different pH levels using citrate buffer and phosphate buffer to further evaluate its stability. The absorbance intensity at 607 nm of **MG3** at physiological pH (7.4) was used as a control. The normalized absorbance of **MG3** at various pH levels is presented in Figure S5b, showing only slight variation within the pH range of 2 to 12. These results demonstrate that MG3 remains stable across a wide range of pH values.



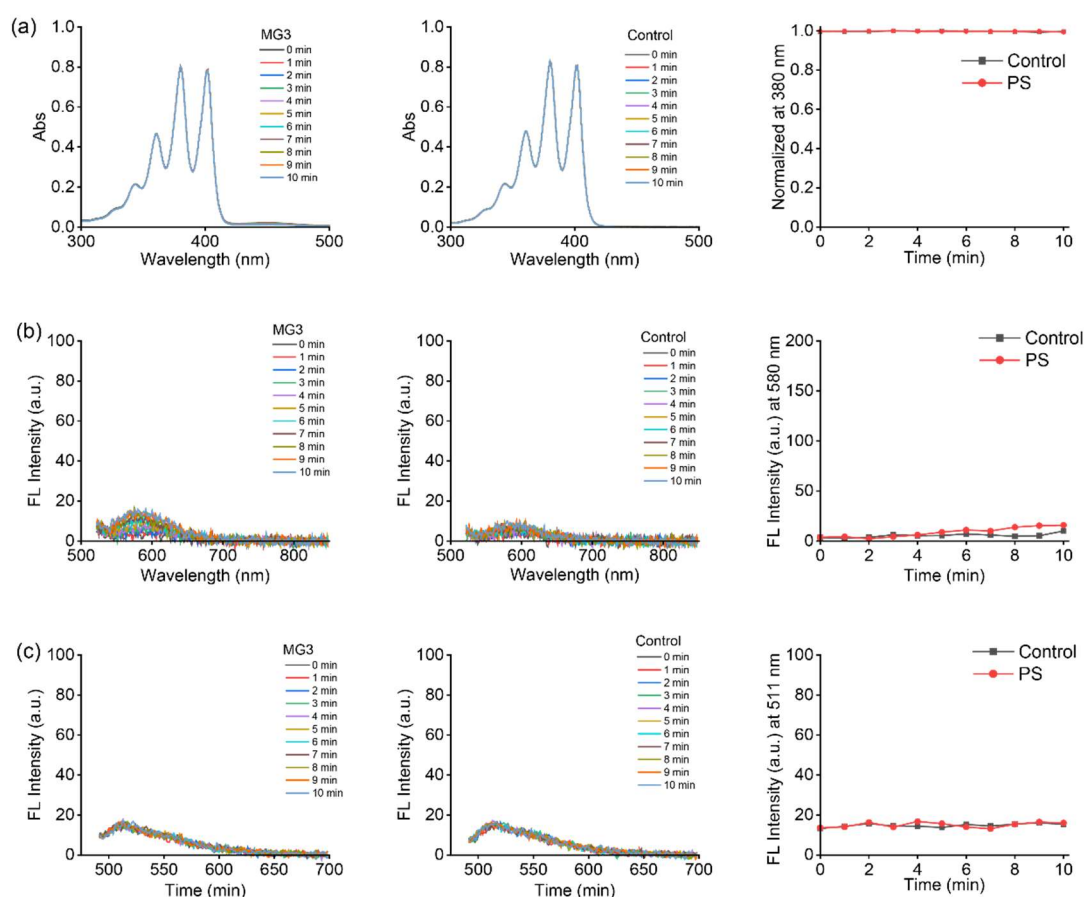

Figure S6. Detection of ROS species generation of **MG3** after irradiation with a 660 nm LED light source (40 mW/cm<sup>2</sup>). (a) UV-vis absorption spectra of PBS solution containing 70 μM ABDA after irradiation at 660 nm for different time periods. (b) Fluorescence emission spectra of PBS solution containing 40 μM DHE after irradiation at 660 nm for different time periods. (c) Fluorescence emission spectra of PBS solution containing 40 μM HPF after irradiation at 660 nm for different time periods.

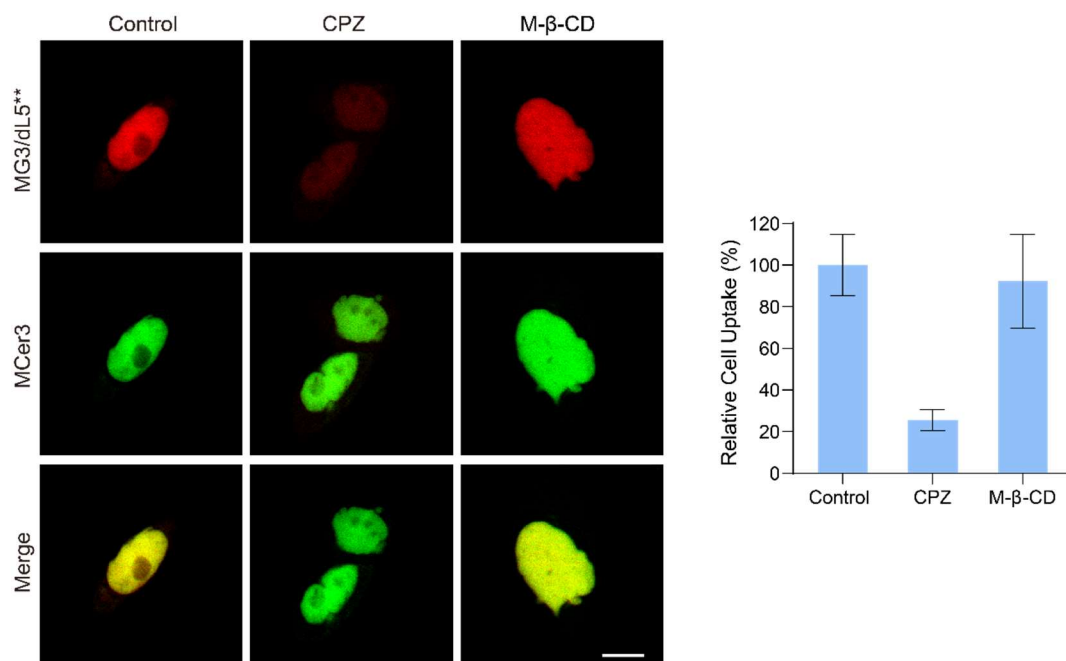

Figure S7. The cellular uptake of MG3 after pre-treated with endocytosis inhibitors (n = 10). Scale bar = 10 μm. Endocytosis inhibitors chlorpromazine (CPZ) and methyl-β-cyclodextrin (M-β-CD) were utilized to investigate the cellular uptake mechanism of **MG3**. CPZ is known as a clathrin-mediated endocytosis inhibitor, while M-β-CD acts as a lipid raft inhibitor. HeLa cells were incubated with CPZ (15 μg/mL) and M-β-CD (100 μg/mL) for 1 hour. Following this treatment, the culture medium was replaced with fresh medium containing **MG3** (200 nM) for an additional 30 minutes. Confocal imaging was then performed to elucidate the endocytosis pathways associated with **MG3** uptake. To account for potential variability in the expression levels of dL5\*\* protein among individual cells, we evaluated the cellular uptake of **MG3** by calculating the fluorescence

intensity ratio of MG3 (640 nm channel) to mCer3 (405 nm channel). The results showed that the fluorescence intensity ratio in cells treated with CPZ decreased to 25% compared to the control group, while cells treated with M-β-CD maintained a nearly constant ratio. These findings suggest that the cellular uptake of **MG3** is primarily mediated by clathrin-dependent endocytosis.

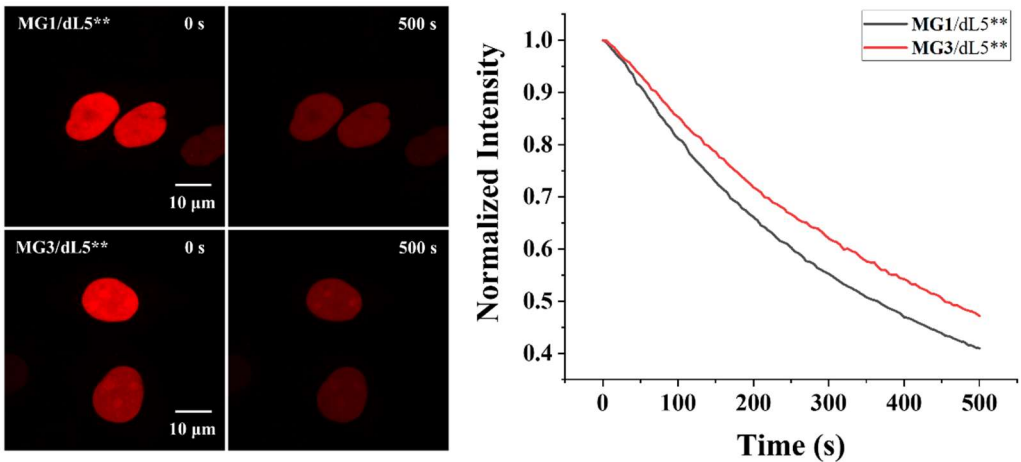

Figure S8. Quantification of the relative fluorescent intensity of MG1/dL5\*\* and MG3/dL5\*\* in HeLa cells with continuous irradiation using confocal microscopy.

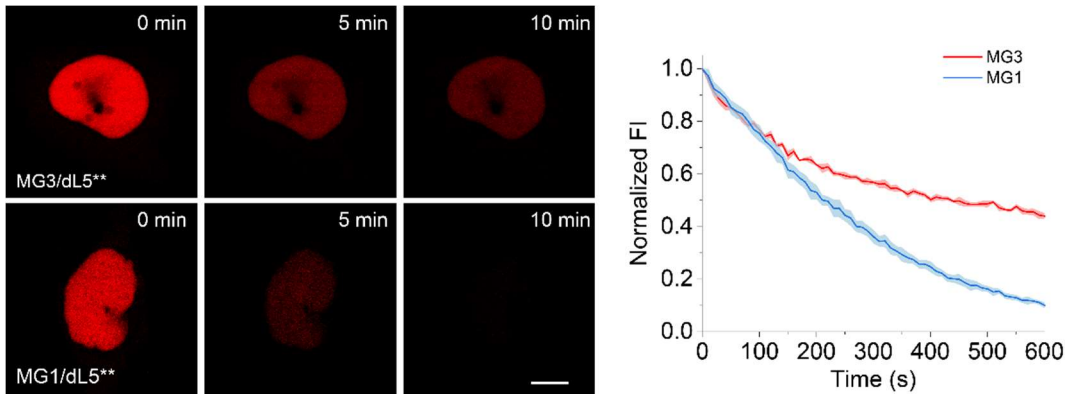

Figure S9. Quantification of the relative fluorescent intensity of **MG1/dL5\*\*** and **MG3/dL5\*\*** in HeLa cells with continuous irradiation by confocal imaging. Scale bar = 10 μm.

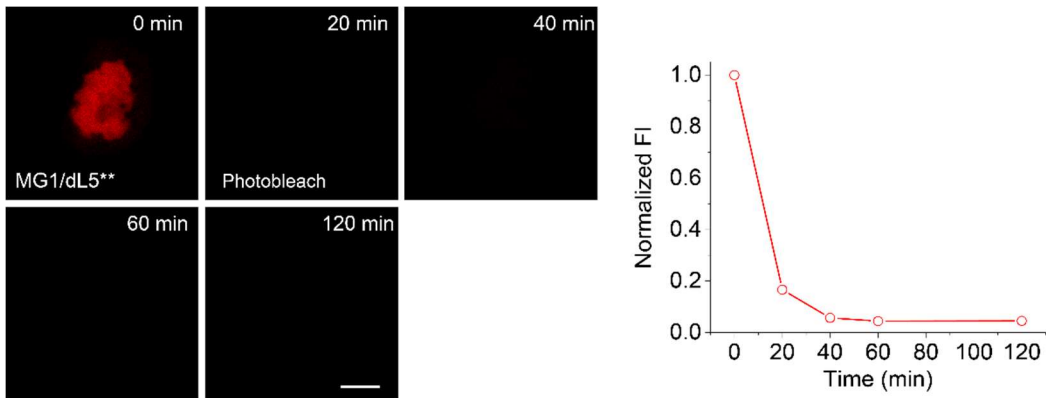

Figure S10. Fluorescence variation of **MG1/dL5\*\*** in HeLa cells after 20 min continuous irradiation of 640 nm laser. Scale bar = 10 μm.

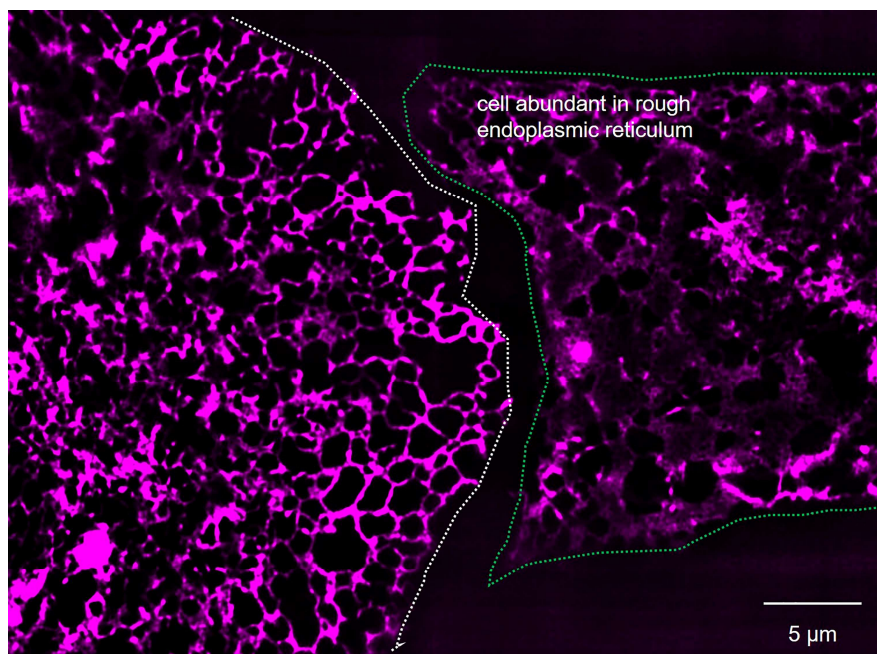

Figure S11. SIM imaging of endoplasmic reticulum in living HeLa cells with **MG3**.

## 4.5 Results of quantum chemical calculations

### 4.5.1 Geometry optimization

Table S2. Calculated atomic coordinates of **MG1**.

| Atom# | Symbol | X        | Y        | Z        |
|-------|--------|----------|----------|----------|
| 1     | C      | 1.390701 | 4.703638 | -2.01713 |
| 2     | C      | 1.81887  | 3.349515 | -2.13347 |
| 3     | C      | 0.987547 | 2.317446 | -1.78238 |
| 4     | C      | -0.33694 | 2.539643 | -1.32159 |
| 5     | C      | -0.75479 | 3.892013 | -1.21099 |
| 6     | C      | 0.072322 | 4.937707 | -1.52943 |
| 7     | C      | -1.20039 | 1.453713 | -0.97543 |
| 8     | C      | -2.62041 | 1.565471 | -1.1092  |
| 9     | C      | -3.21701 | 2.38671  | -2.10128 |
| 10    | C      | -4.57728 | 2.490522 | -2.23816 |
| 11    | C      | -5.45473 | 1.791853 | -1.35952 |
| 12    | C      | -4.86494 | 0.966175 | -0.35926 |
| 13    | C      | -3.50258 | 0.850013 | -0.25788 |
| 14    | N      | -6.79503 | 1.90303  | -1.47487 |
| 15    | N      | 2.205124 | 5.726618 | -2.35074 |
| 16    | C      | 1.730033 | 7.1085   | -2.28722 |
| 17    | C      | 3.582882 | 5.476062 | -2.77337 |
| 18    | C      | -7.68462 | 1.122015 | -0.61595 |
| 19    | C      | -7.38467 | 2.80871  | -2.46014 |
| 20    | C      | -0.62553 | 0.21196  | -0.47987 |
| 21    | C      | -1.16892 | -1.03897 | -0.84524 |
| 22    | C      | -0.61476 | -2.21617 | -0.39243 |
| 23    | C      | 0.494539 | -2.18605 | 0.468997 |
| 24    | C      | 1.041252 | -0.95614 | 0.86225  |
| 25    | C      | 0.489553 | 0.218221 | 0.377393 |

|    |   |          |          |          |
|----|---|----------|----------|----------|
| 26 | O | 0.96124  | -3.3895  | 0.861833 |
| 27 | C | 2.112795 | -3.43388 | 1.732514 |
| 28 | C | 2.432604 | -4.8954  | 1.969976 |
| 29 | C | 3.626871 | -5.03069 | 2.906526 |
| 30 | C | 4.010454 | -6.46682 | 3.158516 |
| 31 | O | 5.013274 | -6.54869 | 4.047767 |
| 32 | O | 3.495771 | -7.43472 | 2.632504 |
| 33 | C | 5.488623 | -7.89163 | 4.369256 |
| 34 | C | 6.597531 | -7.74253 | 5.382503 |
| 35 | H | 2.802422 | 3.118237 | -2.52423 |
| 36 | H | 1.336054 | 1.297688 | -1.91549 |
| 37 | H | -1.73721 | 4.109503 | -0.8027  |
| 38 | H | -0.28305 | 5.949438 | -1.37581 |
| 39 | H | -2.57988 | 2.900509 | -2.81497 |
| 40 | H | -4.97644 | 3.091064 | -3.04657 |
| 41 | H | -5.48884 | 0.436    | 0.349967 |
| 42 | H | -3.08829 | 0.236299 | 0.536489 |
| 43 | H | 0.818738 | 7.237272 | -2.88247 |
| 44 | H | 1.519937 | 7.41194  | -1.25324 |
| 45 | H | 2.499948 | 7.765556 | -2.69048 |
| 46 | H | 4.129117 | 4.903264 | -2.01475 |
| 47 | H | 3.614967 | 4.923063 | -3.72097 |
| 48 | H | 4.0882   | 6.431034 | -2.91383 |
| 49 | H | -8.71464 | 1.286835 | -0.93101 |
| 50 | H | -7.46607 | 0.050705 | -0.69484 |
| 51 | H | -7.59001 | 1.422993 | 0.435512 |
| 52 | H | -7.1655  | 2.481572 | -3.48485 |
| 53 | H | -8.4658  | 2.820853 | -2.32577 |
| 54 | H | -7.00781 | 3.829906 | -2.33013 |
| 55 | H | -2.01214 | -1.07443 | -1.52885 |
| 56 | H | -1.01544 | -3.1776  | -0.69932 |
| 57 | H | 1.881572 | -0.90633 | 1.544577 |
| 58 | H | 0.905204 | 1.167856 | 0.70178  |
| 59 | H | 2.955089 | -2.91908 | 1.250182 |
| 60 | H | 1.87549  | -2.92144 | 2.675189 |
| 61 | H | 1.558793 | -5.39522 | 2.402983 |
| 62 | H | 2.649251 | -5.38156 | 1.012458 |
| 63 | H | 4.509836 | -4.52053 | 2.497921 |
| 64 | H | 3.427927 | -4.55763 | 3.876788 |
| 65 | H | 4.647243 | -8.47157 | 4.763121 |
| 66 | H | 5.837051 | -8.36581 | 3.445562 |
| 67 | H | 6.977933 | -8.7341  | 5.64655  |
| 68 | H | 7.424932 | -7.15363 | 4.975259 |
| 69 | H | 6.233633 | -7.2592  | 6.294182 |

Table S3. Calculated atomic coordinates of **MG2**.

| Atom# | Symbol | X        | Y        | Z        |
|-------|--------|----------|----------|----------|
| 1     | C      | 0.840098 | 5.644558 | -2.3291  |
| 2     | C      | 1.295391 | 4.310615 | -2.48475 |

|    |   |          |          |          |
|----|---|----------|----------|----------|
| 3  | C | 0.4743   | 3.257146 | -2.17621 |
| 4  | C | -0.85948 | 3.456163 | -1.72856 |
| 5  | C | -1.30219 | 4.798641 | -1.58543 |
| 6  | C | -0.48067 | 5.861062 | -1.86028 |
| 7  | C | -1.71382 | 2.349408 | -1.42423 |
| 8  | C | -3.13261 | 2.443547 | -1.58851 |
| 9  | C | -3.71418 | 3.271854 | -2.58535 |
| 10 | C | -5.07299 | 3.357096 | -2.7478  |
| 11 | C | -5.94484 | 2.634752 | -1.89375 |
| 12 | C | -5.37994 | 1.806017 | -0.89116 |
| 13 | C | -4.01912 | 1.703878 | -0.76077 |
| 14 | N | -7.27956 | 2.72938  | -2.03497 |
| 15 | N | 1.64575  | 6.683301 | -2.61462 |
| 16 | C | -1.13236 | 1.109252 | -0.93826 |
| 17 | C | -1.65632 | -0.14324 | -1.32842 |
| 18 | C | -1.0978  | -1.3191  | -0.87937 |
| 19 | C | -0.00537 | -1.28693 | 0.004098 |
| 20 | C | 0.52276  | -0.05581 | 0.420019 |
| 21 | C | -0.03118 | 1.117821 | -0.06203 |
| 22 | O | 0.464468 | -2.48855 | 0.393718 |
| 23 | C | 1.593793 | -2.53262 | 1.294259 |
| 24 | C | 1.911013 | -3.99402 | 1.535021 |
| 25 | C | 3.080466 | -4.12922 | 2.502247 |
| 26 | C | 3.452984 | -5.56559 | 2.769334 |
| 27 | O | 4.459673 | -5.64557 | 3.654157 |
| 28 | O | 2.926458 | -6.5351  | 2.258109 |
| 29 | C | 4.919422 | -6.98892 | 3.996462 |
| 30 | C | 6.028601 | -6.837   | 5.009004 |
| 31 | H | 2.298626 | 4.133738 | -2.86345 |
| 32 | H | 0.83437  | 2.244321 | -2.32911 |
| 33 | H | -2.29611 | 4.988231 | -1.19166 |
| 34 | H | -0.82688 | 6.8792   | -1.70295 |
| 35 | H | -3.06569 | 3.805441 | -3.27368 |
| 36 | H | -5.495   | 3.964874 | -3.54388 |
| 37 | H | -6.03891 | 1.262304 | -0.21952 |
| 38 | H | -3.60954 | 1.085154 | 0.031952 |
| 39 | H | -7.68593 | 3.322764 | -2.74057 |
| 40 | H | -7.90355 | 2.208664 | -1.43929 |
| 41 | H | 1.322325 | 7.632401 | -2.5163  |
| 42 | H | 2.589574 | 6.536028 | -2.9351  |
| 43 | H | -2.48611 | -0.17906 | -2.02812 |
| 44 | H | -1.48178 | -2.28129 | -1.20449 |
| 45 | H | 1.349906 | -0.00554 | 1.118192 |
| 46 | H | 0.367832 | 2.067932 | 0.281051 |
| 47 | H | 2.446087 | -2.01302 | 0.835391 |
| 48 | H | 1.329701 | -2.02464 | 2.232112 |
| 49 | H | 1.027388 | -4.49701 | 1.9436   |
| 50 | H | 2.153605 | -4.47685 | 0.581922 |
| 51 | H | 3.974402 | -3.61934 | 2.118589 |

|    |   |          |          |          |
|----|---|----------|----------|----------|
| 52 | H | 2.854658 | -3.6558  | 3.46679  |
| 53 | H | 4.071029 | -7.55338 | 4.397673 |
| 54 | H | 5.263782 | -7.48052 | 3.080343 |
| 55 | H | 6.398138 | -7.82863 | 5.287943 |
| 56 | H | 6.862749 | -6.26285 | 4.594499 |
| 57 | H | 5.668586 | -6.33675 | 5.913105 |

Table S4. Calculated atomic coordinates of **MG3**.

| Atom# | Symbol | X        | Y        | Z        |
|-------|--------|----------|----------|----------|
| 1     | C      | -3.25423 | 4.00089  | 0.047449 |
| 2     | C      | -2.07294 | 3.648268 | -0.66113 |
| 3     | C      | -1.64301 | 2.347705 | -0.67848 |
| 4     | C      | -2.36631 | 1.308258 | -0.03064 |
| 5     | C      | -3.54793 | 1.680379 | 0.668335 |
| 6     | C      | -3.97721 | 2.980185 | 0.723973 |
| 7     | C      | -1.91589 | -0.04816 | -0.07295 |
| 8     | C      | -2.83747 | -1.13994 | -0.01282 |
| 9     | C      | -4.16099 | -1.02735 | -0.52092 |
| 10    | C      | -5.0415  | -2.07639 | -0.48535 |
| 11    | C      | -4.65493 | -3.31428 | 0.097785 |
| 12    | C      | -3.33825 | -3.44409 | 0.618887 |
| 13    | C      | -2.46207 | -2.39359 | 0.544038 |
| 14    | N      | -5.50882 | -4.33822 | 0.147365 |
| 15    | N      | -3.67203 | 5.267348 | 0.082669 |
| 16    | C      | -0.48907 | -0.32315 | -0.18286 |
| 17    | C      | -0.01001 | -1.3915  | -0.97125 |
| 18    | C      | 1.340155 | -1.64213 | -1.08819 |
| 19    | C      | 2.266688 | -0.84302 | -0.3985  |
| 20    | C      | 1.816058 | 0.215406 | 0.402834 |
| 21    | C      | 0.456731 | 0.468502 | 0.492364 |
| 22    | O      | 3.564661 | -1.17208 | -0.57057 |
| 23    | C      | 4.57216  | -0.36045 | 0.070653 |
| 24    | C      | 5.919314 | -0.92579 | -0.32953 |
| 25    | C      | 7.042686 | -0.10303 | 0.288692 |
| 26    | C      | 8.412321 | -0.62395 | -0.06616 |
| 27    | O      | 9.372909 | 0.150481 | 0.463628 |
| 28    | O      | 8.63681  | -1.61079 | -0.74019 |
| 29    | C      | 10.75202 | -0.24764 | 0.195339 |
| 30    | C      | 11.64797 | 0.763432 | 0.869016 |
| 31    | C      | -3.12807 | 6.507533 | -0.48536 |
| 32    | C      | -4.3301  | 7.267087 | 0.138232 |
| 33    | C      | -4.83372 | 5.91303  | 0.707134 |
| 34    | C      | -6.89934 | -4.49368 | -0.29791 |
| 35    | C      | -6.85156 | -5.95931 | 0.212806 |
| 36    | C      | -5.38225 | -5.71195 | 0.650062 |
| 37    | H      | -1.52276 | 4.414135 | -1.19974 |
| 38    | H      | -0.75397 | 2.095076 | -1.24837 |
| 39    | H      | -4.09231 | 0.923077 | 1.224457 |
| 40    | H      | -4.8579  | 3.241196 | 1.303277 |

|    |   |          |          |          |
|----|---|----------|----------|----------|
| 41 | H | -4.4628  | -0.10398 | -1.00602 |
| 42 | H | -6.03064 | -1.97548 | -0.92206 |
| 43 | H | -3.03646 | -4.37646 | 1.08685  |
| 44 | H | -1.46914 | -2.50495 | 0.96918  |
| 45 | H | -0.71514 | -2.0012  | -1.5287  |
| 46 | H | 1.706685 | -2.44655 | -1.71882 |
| 47 | H | 2.50887  | 0.832868 | 0.962283 |
| 48 | H | 0.114029 | 1.276627 | 1.132199 |
| 49 | H | 4.465093 | 0.681327 | -0.26224 |
| 50 | H | 4.435047 | -0.40049 | 1.160151 |
| 51 | H | 5.991394 | -1.96814 | 0.000213 |
| 52 | H | 6.007358 | -0.91916 | -1.42173 |
| 53 | H | 6.989321 | 0.94579  | -0.03157 |
| 54 | H | 6.966821 | -0.08695 | 1.384261 |
| 55 | H | 10.90364 | -1.25812 | 0.589536 |
| 56 | H | 10.90099 | -0.27026 | -0.88937 |
| 57 | H | 12.69295 | 0.493672 | 0.687831 |
| 58 | H | 11.47695 | 1.767292 | 0.468739 |
| 59 | H | 11.4788  | 0.779173 | 1.949892 |
| 60 | H | -3.08738 | 6.50067  | -1.58177 |
| 61 | H | -2.14067 | 6.76989  | -0.08553 |
| 62 | H | -4.05374 | 7.998328 | 0.898168 |
| 63 | H | -4.99923 | 7.722913 | -0.59191 |
| 64 | H | -5.79255 | 5.557044 | 0.310412 |
| 65 | H | -4.83877 | 5.830779 | 1.801262 |
| 66 | H | -7.0229  | -4.37262 | -1.3814  |
| 67 | H | -7.59885 | -3.82975 | 0.224993 |
| 68 | H | -7.53466 | -6.16957 | 1.036043 |
| 69 | H | -6.96633 | -6.71052 | -0.56889 |
| 70 | H | -4.62294 | -6.29925 | 0.11875  |
| 71 | H | -5.1929  | -5.76291 | 1.729571 |

Table S5. Calculated atomic coordinates of **MG4**.

| Atom# | Symbol | X        | Y        | Z        |
|-------|--------|----------|----------|----------|
| 1     | C      | -2.72011 | 3.957993 | 0.142465 |
| 2     | C      | -1.51222 | 3.645262 | -0.55792 |
| 3     | C      | -1.09129 | 2.341286 | -0.62955 |
| 4     | C      | -1.81431 | 1.27159  | -0.04001 |
| 5     | C      | -3.00269 | 1.6094   | 0.658547 |
| 6     | C      | -3.45829 | 2.899651 | 0.760696 |
| 7     | C      | -1.35786 | -0.07776 | -0.13978 |
| 8     | C      | -2.26925 | -1.18016 | -0.12504 |
| 9     | C      | -1.88182 | -2.45179 | 0.366387 |
| 10    | C      | -2.73802 | -3.52513 | 0.404508 |
| 11    | C      | -4.07499 | -3.37692 | -0.08413 |
| 12    | C      | -4.47473 | -2.11475 | -0.62781 |
| 13    | C      | -3.59388 | -1.06171 | -0.61525 |
| 14    | N      | -4.94692 | -4.41451 | -0.03457 |
| 15    | N      | -3.15194 | 5.23632  | 0.227343 |

|    |   |          |          |          |
|----|---|----------|----------|----------|
| 16 | C | -2.50563 | 6.340967 | -0.49076 |
| 17 | C | -4.30618 | 5.628096 | 1.043659 |
| 18 | C | -4.52159 | -5.74935 | 0.397394 |
| 19 | C | -6.29044 | -4.32469 | -0.61634 |
| 20 | C | 0.073212 | -0.34034 | -0.26285 |
| 21 | C | 0.557373 | -1.35957 | -1.10947 |
| 22 | C | 1.909162 | -1.60196 | -1.23561 |
| 23 | C | 2.83142  | -0.84374 | -0.49725 |
| 24 | C | 2.375887 | 0.166315 | 0.360644 |
| 25 | C | 1.014756 | 0.412163 | 0.459209 |
| 26 | O | 4.132565 | -1.16194 | -0.68118 |
| 27 | C | 5.132027 | -0.40091 | 0.028808 |
| 28 | C | 6.483957 | -0.94409 | -0.38624 |
| 29 | C | 7.598879 | -0.18241 | 0.319304 |
| 30 | C | 8.972763 | -0.68331 | -0.04767 |
| 31 | O | 9.926419 | 0.032934 | 0.569603 |
| 32 | O | 9.206161 | -1.61113 | -0.79807 |
| 33 | C | 11.3083  | -0.35537 | 0.300988 |
| 34 | C | 12.1957  | 0.579618 | 1.086446 |
| 35 | C | -1.69575 | 5.849814 | -1.67609 |
| 36 | C | -0.73849 | 4.756992 | -1.21261 |
| 37 | C | -4.7093  | 3.229782 | 1.528906 |
| 38 | C | -4.58863 | 4.620512 | 2.142586 |
| 39 | C | -2.27726 | -4.85238 | 0.950439 |
| 40 | C | -3.45601 | -5.66083 | 1.47574  |
| 41 | C | -6.83005 | -2.90711 | -0.5522  |
| 42 | C | -5.84582 | -1.96385 | -1.23225 |
| 43 | H | -0.19239 | 2.11967  | -1.19906 |
| 44 | H | -3.54974 | 0.826283 | 1.176884 |
| 45 | H | -0.8825  | -2.57592 | 0.775827 |
| 46 | H | -3.91026 | -0.12091 | -1.05838 |
| 47 | H | -3.29962 | 7.023654 | -0.81865 |
| 48 | H | -1.86375 | 6.897074 | 0.210547 |
| 49 | H | -5.18606 | 5.743058 | 0.391075 |
| 50 | H | -4.0833  | 6.614689 | 1.468675 |
| 51 | H | -5.40827 | -6.27291 | 0.769651 |
| 52 | H | -4.14155 | -6.31515 | -0.46886 |
| 53 | H | -6.26086 | -4.67396 | -1.6614  |
| 54 | H | -6.93689 | -5.01117 | -0.05902 |
| 55 | H | -0.14591 | -1.9398  | -1.69983 |
| 56 | H | 2.278916 | -2.36998 | -1.90846 |
| 57 | H | 3.065675 | 0.752459 | 0.956454 |
| 58 | H | 0.668156 | 1.183951 | 1.140653 |
| 59 | H | 5.035472 | 0.661914 | -0.23383 |
| 60 | H | 4.977059 | -0.51357 | 1.110942 |
| 61 | H | 6.541911 | -2.00974 | -0.13812 |
| 62 | H | 6.59605  | -0.85247 | -1.4724  |
| 63 | H | 7.558444 | 0.88938  | 0.084398 |
| 64 | H | 7.499902 | -0.25462 | 1.410755 |



|    |   |          |          |          |
|----|---|----------|----------|----------|
| 65 | H | 11.43985 | -1.39919 | 0.605264 |
| 66 | H | 11.48517 | -0.28145 | -0.77726 |
| 67 | H | 13.24255 | 0.315445 | 0.907719 |
| 68 | H | 12.04459 | 1.617754 | 0.77552  |
| 69 | H | 11.99858 | 0.498701 | 2.159664 |
| 70 | H | -1.15189 | 6.695413 | -2.10828 |
| 71 | H | -2.3691  | 5.454134 | -2.44706 |
| 72 | H | -0.15067 | 4.359048 | -2.04606 |
| 73 | H | -0.02594 | 5.185265 | -0.49207 |
| 74 | H | -4.88552 | 2.467415 | 2.294756 |
| 75 | H | -5.57481 | 3.209854 | 0.850171 |
| 76 | H | -5.50976 | 4.907087 | 2.659249 |
| 77 | H | -3.7724  | 4.634846 | 2.875974 |
| 78 | H | -1.78311 | -5.41949 | 0.148049 |
| 79 | H | -1.52653 | -4.68928 | 1.730932 |
| 80 | H | -3.87938 | -5.18089 | 2.367128 |
| 81 | H | -3.14383 | -6.67176 | 1.755683 |
| 82 | H | -6.96995 | -2.61513 | 0.496321 |
| 83 | H | -7.80823 | -2.87514 | -1.04215 |
| 84 | H | -6.17131 | -0.92145 | -1.1516  |
| 85 | H | -5.80175 | -2.20339 | -2.30473 |

#### 4.5.2 Major MO transitions in excited states

##### MG1:

# 1 2.4760 eV 500.74 nm f= 0.99037 Spin multiplicity= 1:

H -> L 99.1%

# 2 2.8850 eV 429.75 nm f= 0.66465 Spin multiplicity= 1:

H-1 -> L 97.4%

# 3 3.7790 eV 328.09 nm f= 0.00374 Spin multiplicity= 1:

H-2 -> L 56.0%, H-4 -> L 31.1%, H-3 -> L 8.5%

# 4 3.8100 eV 325.42 nm f= 0.00081 Spin multiplicity= 1:

H-3 -> L 69.3%, H-4 -> L 27.7%

# 5 3.8640 eV 320.87 nm f= 0.00676 Spin multiplicity= 1:

H-4 -> L 38.5%, H-2 -> L 36.3%, H-3 -> L 19.0%

# 6 4.0450 eV 306.51 nm f= 0.00533 Spin multiplicity= 1:

H-5 -> L 96.3%

# 7 4.3650 eV 284.04 nm f= 0.07382 Spin multiplicity= 1:

H -> L+1 93.1%

# 8 4.6510 eV 266.58 nm f= 0.15491 Spin multiplicity= 1:

H -> L+2 76.0%, H-1 -> L+1 10.2%

# 9 4.6740 eV 265.26 nm f= 0.00001 Spin multiplicity= 1:

H-6 -> L 99.9%

# 10 4.8160 eV 257.44 nm f= 0.06315 Spin multiplicity= 1:

H -> L+3 35.3%, H-1 -> L+1 25.5%, H -> L+2 13.8%, H -> L+4 13.7%

# 11 4.8560 eV 255.32 nm f= 0.05935 Spin multiplicity= 1:

H -> L+3 42.7%, H-1 -> L+1 29.5%, H -> L+5 10.4%, H-8 -> L 7.0%

# 12 4.9450 eV 250.73 nm f= 0.04433 Spin multiplicity= 1:

H-8 -> L 39.5%, H-1 -> L+1 24.5%, H -> L+5 13.1%, H -> L+4 9.2%, H-1 -> L+3 6.9%

# 13 5.0080 eV 247.57 nm f= 0.04488 Spin multiplicity= 1:

H-8 -> L 38.9%, H -> L+5 24.4%, H -> L+4 19.2%

# 14 5.0890 eV 243.63 nm f= 0.11655 Spin multiplicity= 1:  
H -> L+4 46.5%, H -> L+5 36.5%, H -> L+3 6.9%

# 15 5.2570 eV 235.85 nm f= 0.06879 Spin multiplicity= 1:  
H-1 -> L+3 61.0%, H-1 -> L+2 17.6%

# 16 5.2890 eV 234.42 nm f= 0.02291 Spin multiplicity= 1:  
H-1 -> L+2 63.7%, H-1 -> L+3 16.6%

# 17 5.3250 eV 232.83 nm f= 0.00031 Spin multiplicity= 1:  
H-7 -> L 92.7%, H-9 -> L 6.0%

# 18 5.3800 eV 230.45 nm f= 0.00552 Spin multiplicity= 1:  
H-9 -> L 74.9%, H-13 -> L 10.0%, H-7 -> L 6.9%

# 19 5.4900 eV 225.84 nm f= 0.07440 Spin multiplicity= 1:  
H-1 -> L+4 56.4%, H-1 -> L+5 14.9%, H-1 -> L+3 9.0%, H-2 -> L+1 5.8%

# 20 5.5700 eV 222.59 nm f= 0.01291 Spin multiplicity= 1:  
H-1 -> L+5 60.8%, H-1 -> L+4 18.8%, H-1 -> L+2 5.4%

## MG2:

# 1 2.6960 eV 459.88 nm f= 0.81556 Spin multiplicity= 1:  
H -> L 98.9%

# 2 2.9910 eV 414.52 nm f= 0.65016 Spin multiplicity= 1:  
H-1 -> L 98.1%

# 3 3.8350 eV 323.30 nm f= 0.00162 Spin multiplicity= 1:  
H-3 -> L 87.9%, H-2 -> L 9.3%

# 4 3.8480 eV 322.20 nm f= 0.00001 Spin multiplicity= 1:  
H-4 -> L 91.7%, H-2 -> L 5.0%

# 5 4.0540 eV 305.83 nm f= 0.00362 Spin multiplicity= 1:  
H-5 -> L 53.9%, H-2 -> L 37.6%

# 6 4.0970 eV 302.62 nm f= 0.00231 Spin multiplicity= 1:  
H-5 -> L 43.7%, H-2 -> L 40.6%, H-3 -> L 6.6%

# 7 4.5330 eV 273.51 nm f= 0.08063 Spin multiplicity= 1:  
H -> L+1 94.0%

# 8 4.6710 eV 265.43 nm f= 0.00001 Spin multiplicity= 1:  
H-6 -> L 99.8%

# 9 4.8340 eV 256.48 nm f= 0.14794 Spin multiplicity= 1:  
H -> L+2 71.6%, H-1 -> L+1 15.8%

# 10 4.9600 eV 249.97 nm f= 0.01214 Spin multiplicity= 1:  
H-1 -> L+1 67.1%, H -> L+2 20.9%

# 11 5.0240 eV 246.78 nm f= 0.08434 Spin multiplicity= 1:  
H -> L+3 71.9%, H -> L+4 6.0%, H-1 -> L+1 6.0%

# 12 5.1310 eV 241.64 nm f= 0.07237 Spin multiplicity= 1:  
H -> L+4 57.5%, H -> L+5 18.4%

# 13 5.3050 eV 233.71 nm f= 0.13291 Spin multiplicity= 1:  
H -> L+5 59.1%, H-1 -> L+2 14.9%, H -> L+4 13.1%

# 14 5.3270 eV 232.75 nm f= 0.00387 Spin multiplicity= 1:  
H-7 -> L 96.8%

# 15 5.3660 eV 231.06 nm f= 0.02526 Spin multiplicity= 1:  
H-1 -> L+3 73.1%, H -> L+4 6.7%, H-1 -> L+2 5.8%

# 16 5.4360 eV 228.08 nm f= 0.00844 Spin multiplicity= 1:  
H-1 -> L+2 56.9%, H-1 -> L+4 8.8%, H -> L+3 7.6%, H-1 -> L+3 5.9%

# 17 5.4950 eV 225.63 nm f= 0.00457 Spin multiplicity= 1:

H-9 -> L 52.2%, H-1 -> L+5 14.5%, H-13 -> L 13.5%, H-1 -> L+4 6.7%  
# 18 5.5560 eV 223.15 nm f= 0.01984 Spin multiplicity= 1:  
H-8 -> L 42.1%, H-10 -> L 34.8%  
# 19 5.6590 eV 219.09 nm f= 0.08441 Spin multiplicity= 1:  
H-1 -> L+5 29.2%, H-1 -> L+4 26.3%, H-13 -> L 15.3%, H-1 -> L+3 7.9%  
# 20 5.6940 eV 217.75 nm f= 0.02249 Spin multiplicity= 1:  
H-1 -> L+4 38.6%, H-1 -> L+5 30.2%, H-10 -> L 7.9%, H-8 -> L 5.0%

### MG3:

# 1 2.4570 eV 504.62 nm f= 1.08624 Spin multiplicity= 1:  
H -> L 99.1%  
# 2 2.9110 eV 425.92 nm f= 0.67788 Spin multiplicity= 1:  
H-1 -> L 97.4%  
# 3 3.8290 eV 323.80 nm f= 0.00317 Spin multiplicity= 1:  
H-2 -> L 67.1%, H-3 -> L 17.4%, H-4 -> L 9.9%  
# 4 3.8820 eV 319.38 nm f= 0.00186 Spin multiplicity= 1:  
H-3 -> L 61.9%, H-4 -> L 31.3%  
# 5 3.9240 eV 315.96 nm f= 0.00504 Spin multiplicity= 1:  
H-4 -> L 55.0%, H-2 -> L 21.9%, H-3 -> L 17.1%  
# 6 4.1140 eV 301.37 nm f= 0.00449 Spin multiplicity= 1:  
H-5 -> L 96.3%  
# 7 4.2940 eV 288.74 nm f= 0.07217 Spin multiplicity= 1:  
H -> L+1 92.6%  
# 8 4.5850 eV 270.41 nm f= 0.16720 Spin multiplicity= 1:  
H -> L+2 79.7%, H-1 -> L+1 7.2%  
# 9 4.7420 eV 261.46 nm f= 0.00018 Spin multiplicity= 1:  
H-6 -> L 99.8%  
# 10 4.7610 eV 260.42 nm f= 0.09687 Spin multiplicity= 1:  
H -> L+3 55.1%, H -> L+4 16.1%, H-1 -> L+1 10.5%, H -> L+2 9.3%  
# 11 4.8120 eV 257.66 nm f= 0.03737 Spin multiplicity= 1:  
H-1 -> L+1 42.1%, H -> L+3 22.8%, H -> L+5 16.2%, H -> L+2 6.1%  
# 12 4.9140 eV 252.31 nm f= 0.08678 Spin multiplicity= 1:  
H-1 -> L+1 34.0%, H -> L+4 28.2%, H -> L+5 22.9%  
# 13 5.0210 eV 246.93 nm f= 0.10902 Spin multiplicity= 1:  
H -> L+4 40.1%, H -> L+5 25.0%, H-8 -> L 17.5%, H -> L+3 7.6%  
# 14 5.0340 eV 246.29 nm f= 0.02754 Spin multiplicity= 1:  
H-8 -> L 58.5%, H -> L+5 25.3%, H-1 -> L+3 5.1%  
# 15 5.2340 eV 236.88 nm f= 0.08001 Spin multiplicity= 1:  
H-1 -> L+3 42.9%, H-1 -> L+2 33.4%, H-8 -> L 6.0%  
# 16 5.2620 eV 235.62 nm f= 0.02758 Spin multiplicity= 1:  
H-1 -> L+2 48.4%, H-1 -> L+3 31.1%, H-1 -> L+4 7.9%  
# 17 5.3890 eV 230.07 nm f= 0.00087 Spin multiplicity= 1:  
H-7 -> L 82.2%, H-9 -> L 14.9%  
# 18 5.4270 eV 228.46 nm f= 0.00450 Spin multiplicity= 1:  
H-9 -> L 68.0%, H-7 -> L 17.5%  
# 19 5.4710 eV 226.62 nm f= 0.08530 Spin multiplicity= 1:  
H-1 -> L+4 50.1%, H-1 -> L+5 20.9%, H-1 -> L+3 9.7%, H-2 -> L+1 5.2%  
# 20 5.5450 eV 223.60 nm f= 0.01952 Spin multiplicity= 1:  
H-1 -> L+5 57.0%, H-1 -> L+4 27.6%, H-1 -> L+2 6.2%

**MG4:**

# 1 2.3450 eV 528.72 nm  $f= 1.02989$  Spin multiplicity= 1:  
H -> L 99.1%

# 2 2.8750 eV 431.25 nm  $f= 0.60150$  Spin multiplicity= 1:  
H-1 -> L 96.9%

# 3 3.4520 eV 359.17 nm  $f= 0.00006$  Spin multiplicity= 1:  
H-2 -> L 67.5%, H-3 -> L 30.2%

# 4 3.5630 eV 347.98 nm  $f= 0.00133$  Spin multiplicity= 1:  
H-4 -> L 86.7%, H-3 -> L 11.0%

# 5 3.8150 eV 324.99 nm  $f= 0.02218$  Spin multiplicity= 1:  
H-3 -> L 53.5%, H-2 -> L 26.9%, H-4 -> L 10.6%

# 6 4.0270 eV 307.88 nm  $f= 0.00618$  Spin multiplicity= 1:  
H-5 -> L 95.8%

# 7 4.1680 eV 297.47 nm  $f= 0.07542$  Spin multiplicity= 1:  
H -> L+1 94.2%

# 8 4.4430 eV 279.06 nm  $f= 0.14569$  Spin multiplicity= 1:  
H -> L+2 87.4%

# 9 4.6060 eV 269.18 nm  $f= 0.09454$  Spin multiplicity= 1:  
H -> L+3 78.2%, H -> L+4 11.0%

# 10 4.6980 eV 263.91 nm  $f= 0.01709$  Spin multiplicity= 1:  
H -> L+5 46.8%, H-1 -> L+1 23.2%, H -> L+4 10.4%, H -> L+2 9.5%

# 11 4.8240 eV 257.02 nm  $f= 0.00004$  Spin multiplicity= 1:  
H-6 -> L 99.9%

# 12 4.8330 eV 256.54 nm  $f= 0.05121$  Spin multiplicity= 1:  
H-1 -> L+1 48.1%, H -> L+4 39.4%

# 13 4.8500 eV 255.64 nm  $f= 0.05952$  Spin multiplicity= 1:  
H -> L+5 36.3%, H -> L+4 31.6%, H-1 -> L+1 18.1%, H -> L+3 5.6%

# 14 5.0300 eV 246.49 nm  $f= 0.00003$  Spin multiplicity= 1:  
H-8 -> L 67.7%, H-1 -> L+3 17.2%, H-10 -> L 6.1%

# 15 5.1640 eV 240.09 nm  $f= 0.06989$  Spin multiplicity= 1:  
H-1 -> L+2 62.7%, H-1 -> L+3 14.1%, H-10 -> L 5.3%

# 16 5.1760 eV 239.54 nm  $f= 0.06418$  Spin multiplicity= 1:  
H-1 -> L+3 50.9%, H-1 -> L+2 20.4%, H-10 -> L 10.6%

# 17 5.2180 eV 237.61 nm  $f= 0.00420$  Spin multiplicity= 1:  
H-9 -> L 65.0%, H-11 -> L 21.3%, H-1 -> L+2 5.1%

# 18 5.2830 eV 234.69 nm  $f= 0.00634$  Spin multiplicity= 1:  
H-10 -> L 67.3%, H-8 -> L 13.5%, H-1 -> L+3 5.8%

# 19 5.4010 eV 229.56 nm  $f= 0.01428$  Spin multiplicity= 1:  
H-1 -> L+4 71.7%, H-8 -> L 5.5%, H-1 -> L+3 5.5%

# 20 5.4580 eV 227.16 nm  $f= 0.00737$  Spin multiplicity= 1:  
H-11 -> L 41.2%, H-7 -> L 19.7%, H-1 -> L+5 18.2%, H-9 -> L 10.7%

## 4.5.3 Spectra calculation

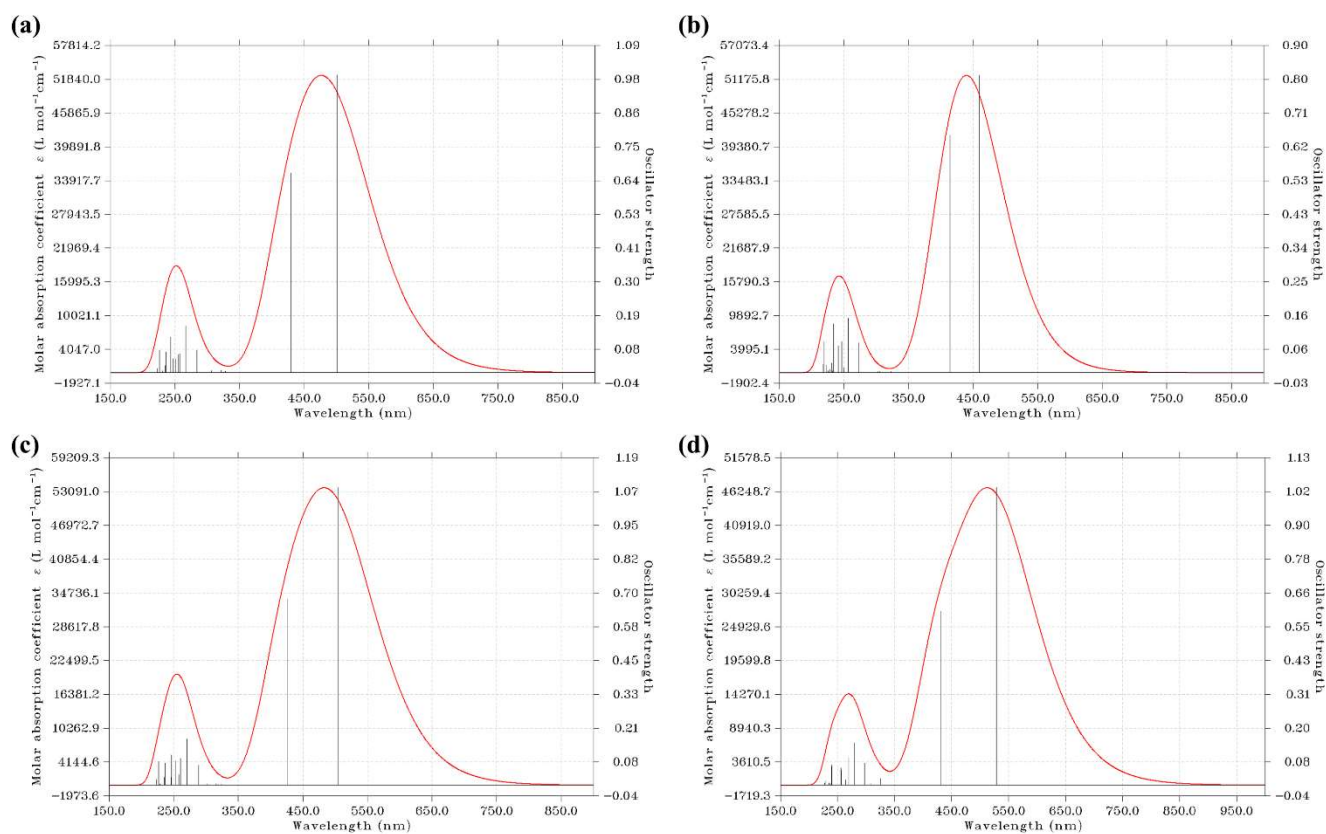

Figure S12. Calculated absorption spectra of (a) MG1, (b) MG2, (c) MG3 and (d) MG4.

## 5 Characterization of compounds

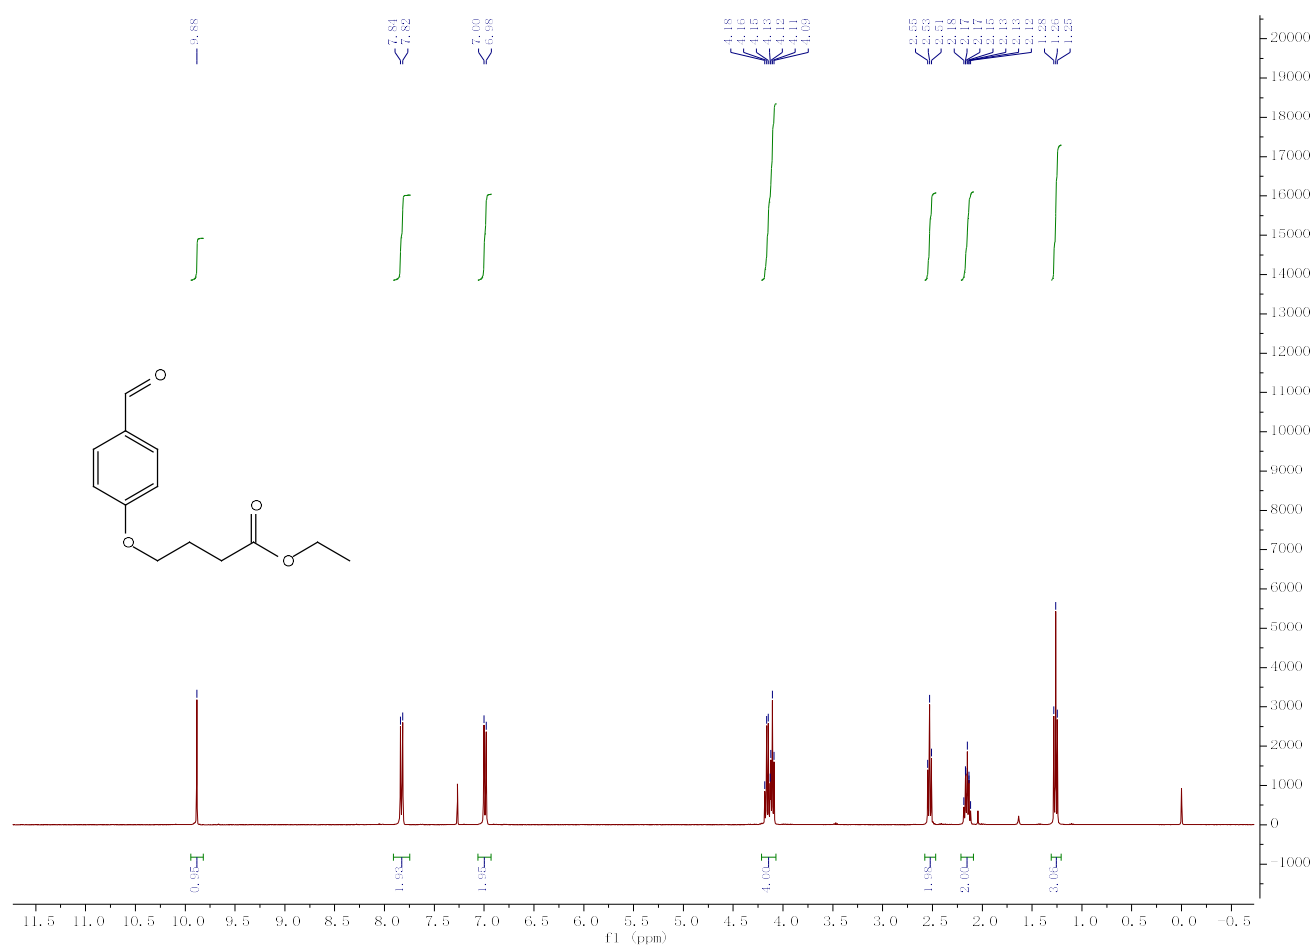

Figure S13.  $^1\text{H}$  NMR spectrum of **3** in  $\text{CDCl}_3$ .

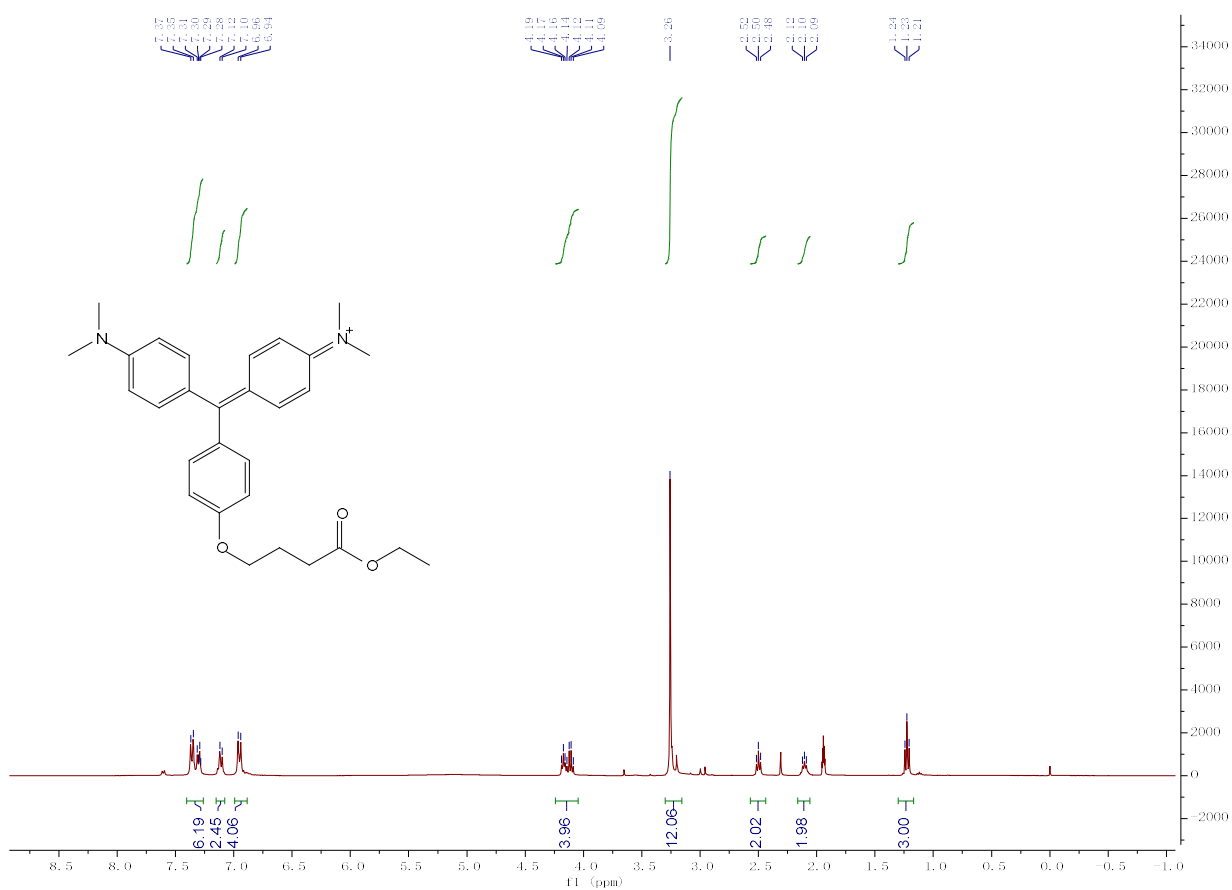

Figure S14. <sup>1</sup>H NMR spectrum of MG1 in CDCl<sub>3</sub>.

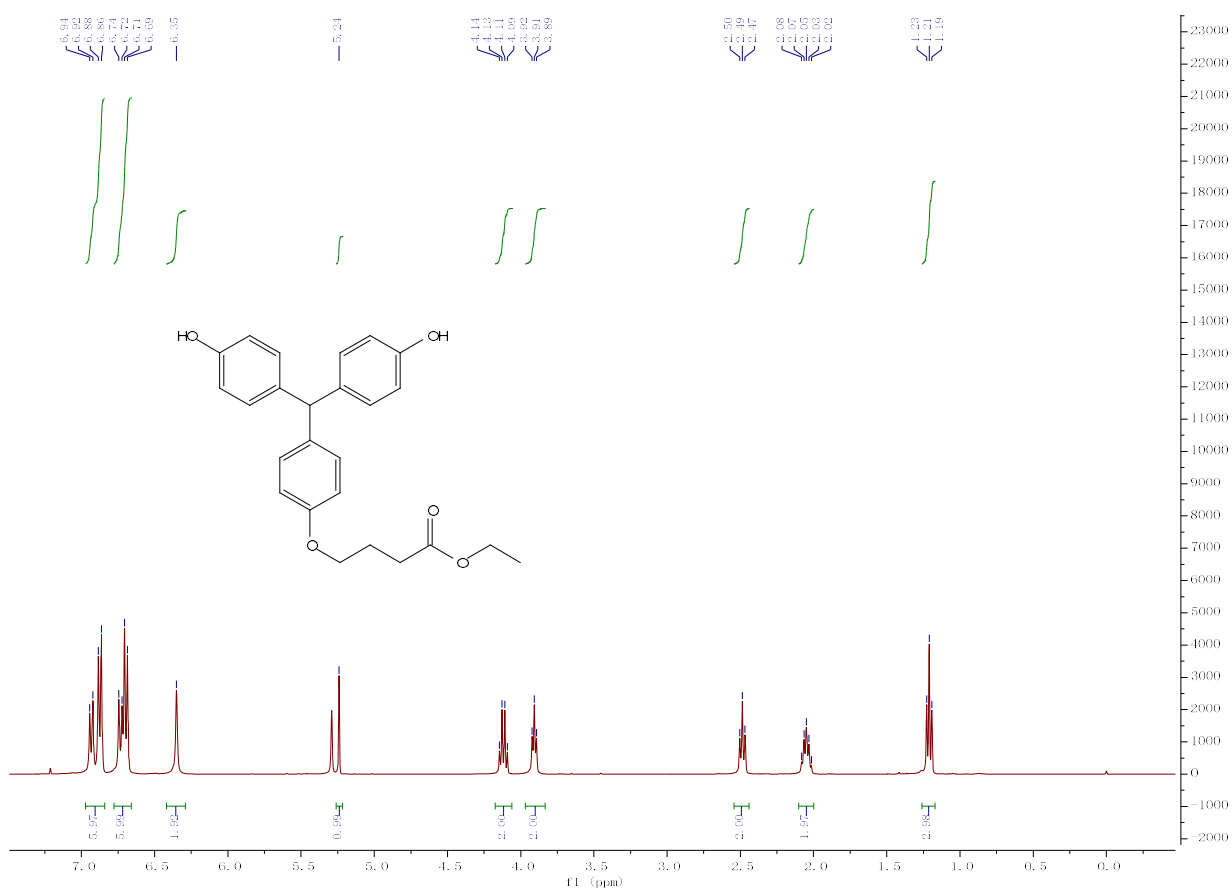

Figure S15. <sup>1</sup>H NMR spectrum of 4 in CDCl<sub>3</sub>.

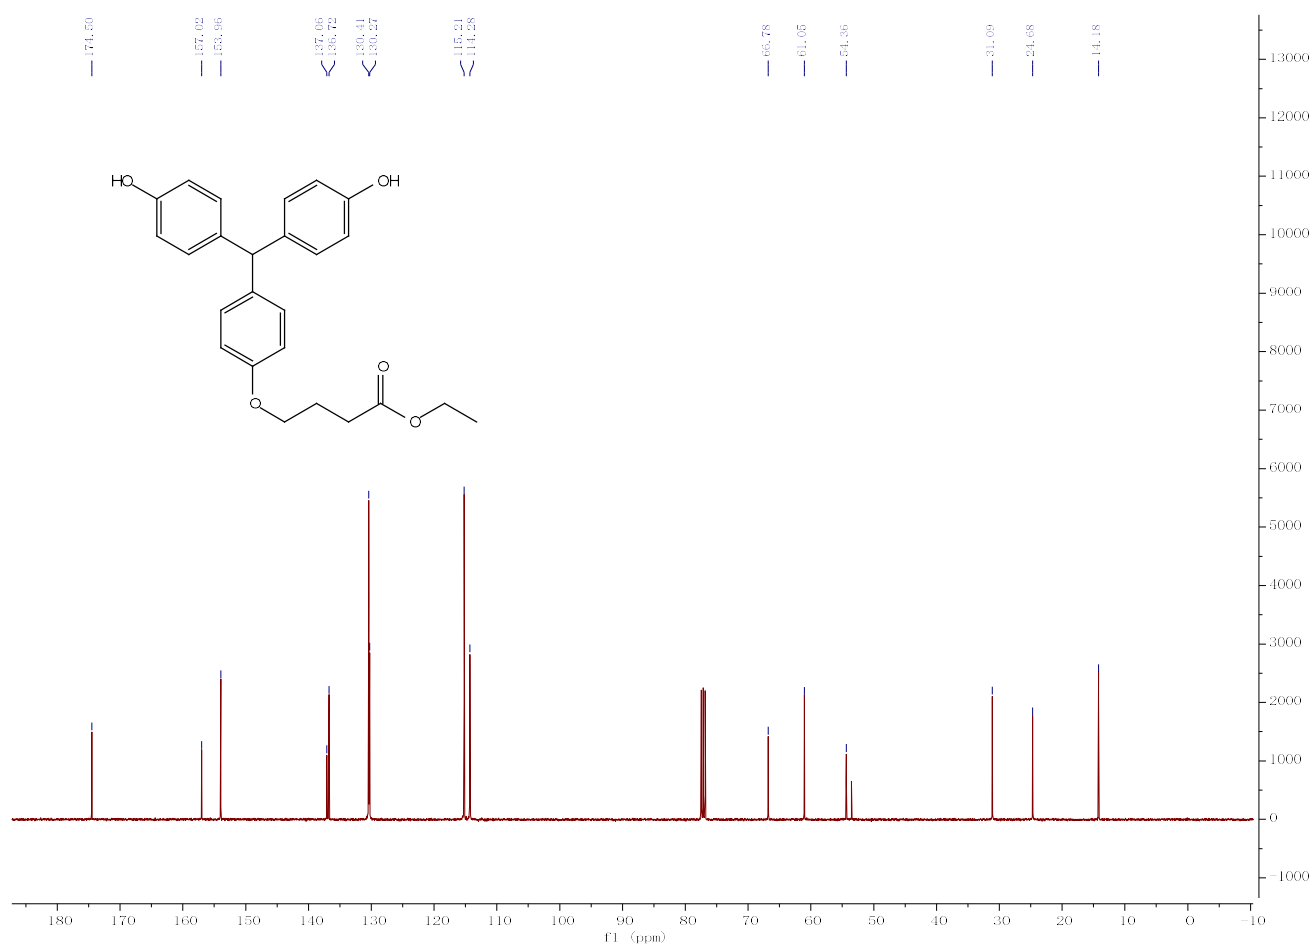

Figure S16. <sup>13</sup>C NMR spectrum of **4** in CDCl<sub>3</sub>.

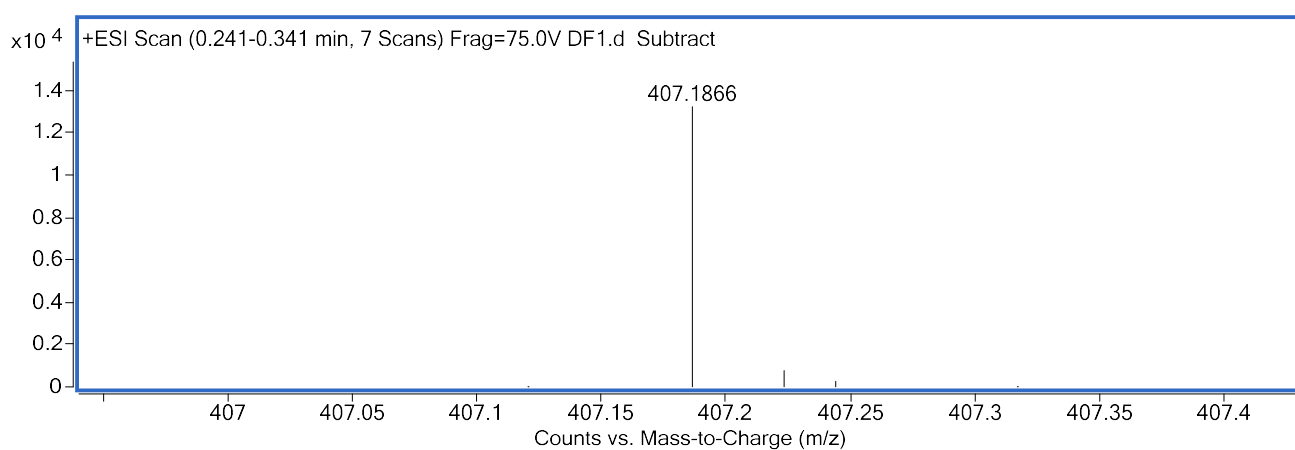

Figure S17. HRMS spectrum of **4** in CDCl<sub>3</sub>.



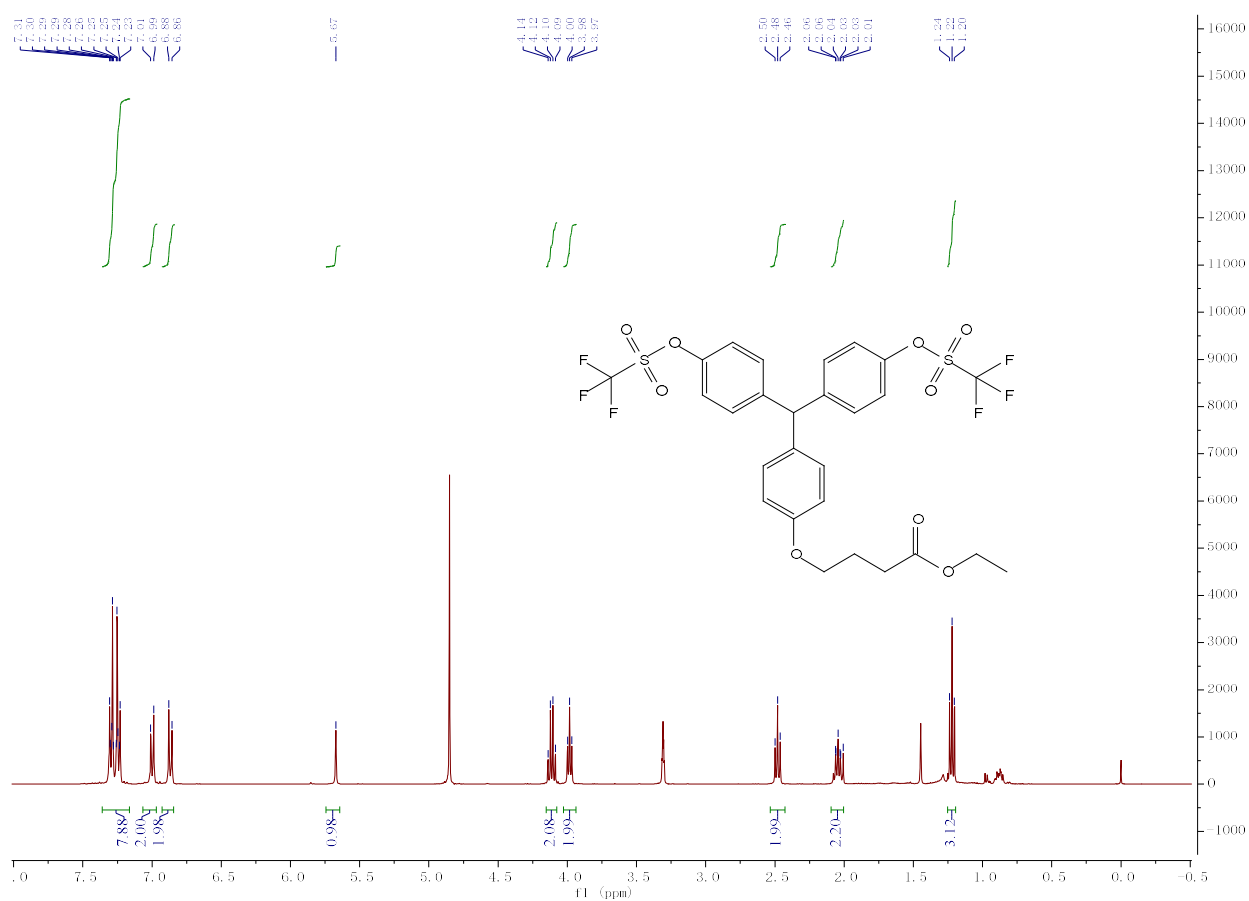

Figure S18. <sup>1</sup>H NMR spectrum of MG1 in CD<sub>3</sub>OD.

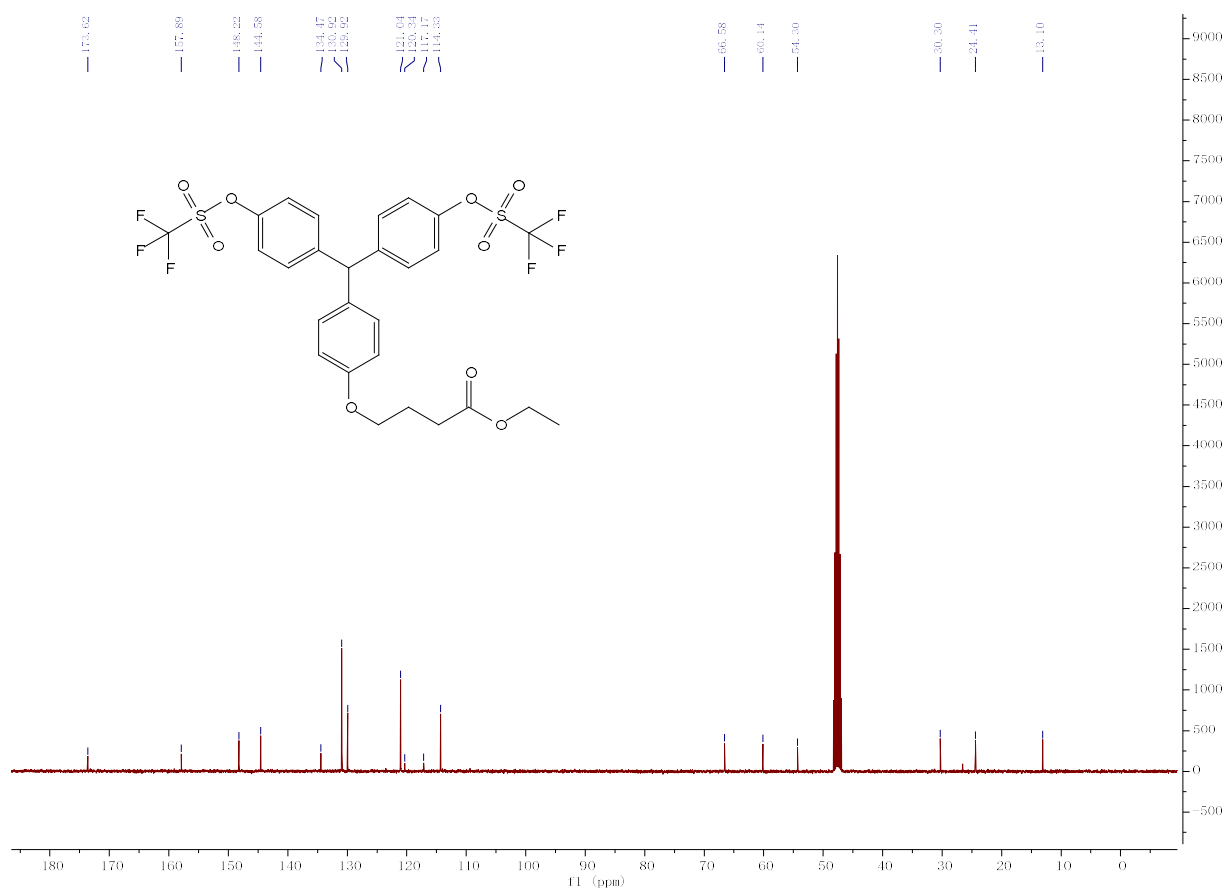

Figure S19. <sup>13</sup>C NMR spectrum of **5** in CD<sub>3</sub>OD.

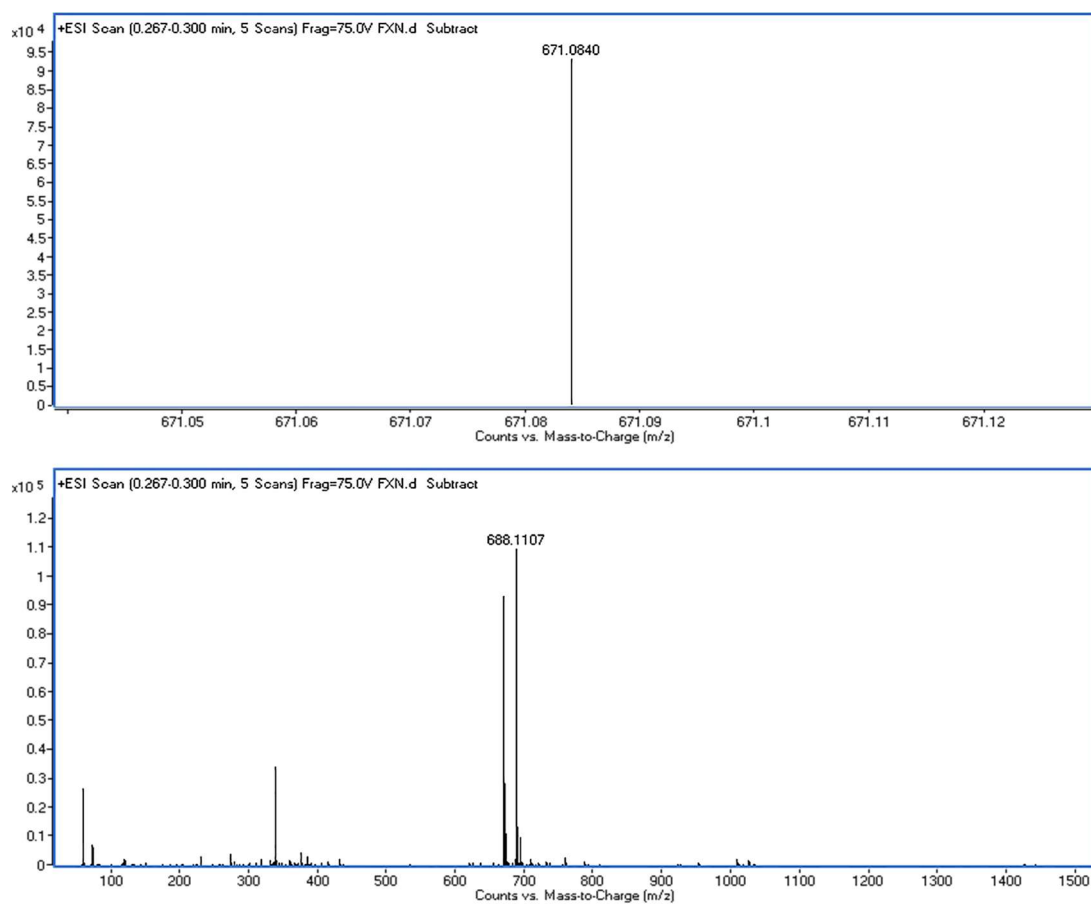

Figure S20 HRMS spectrum of **5**.

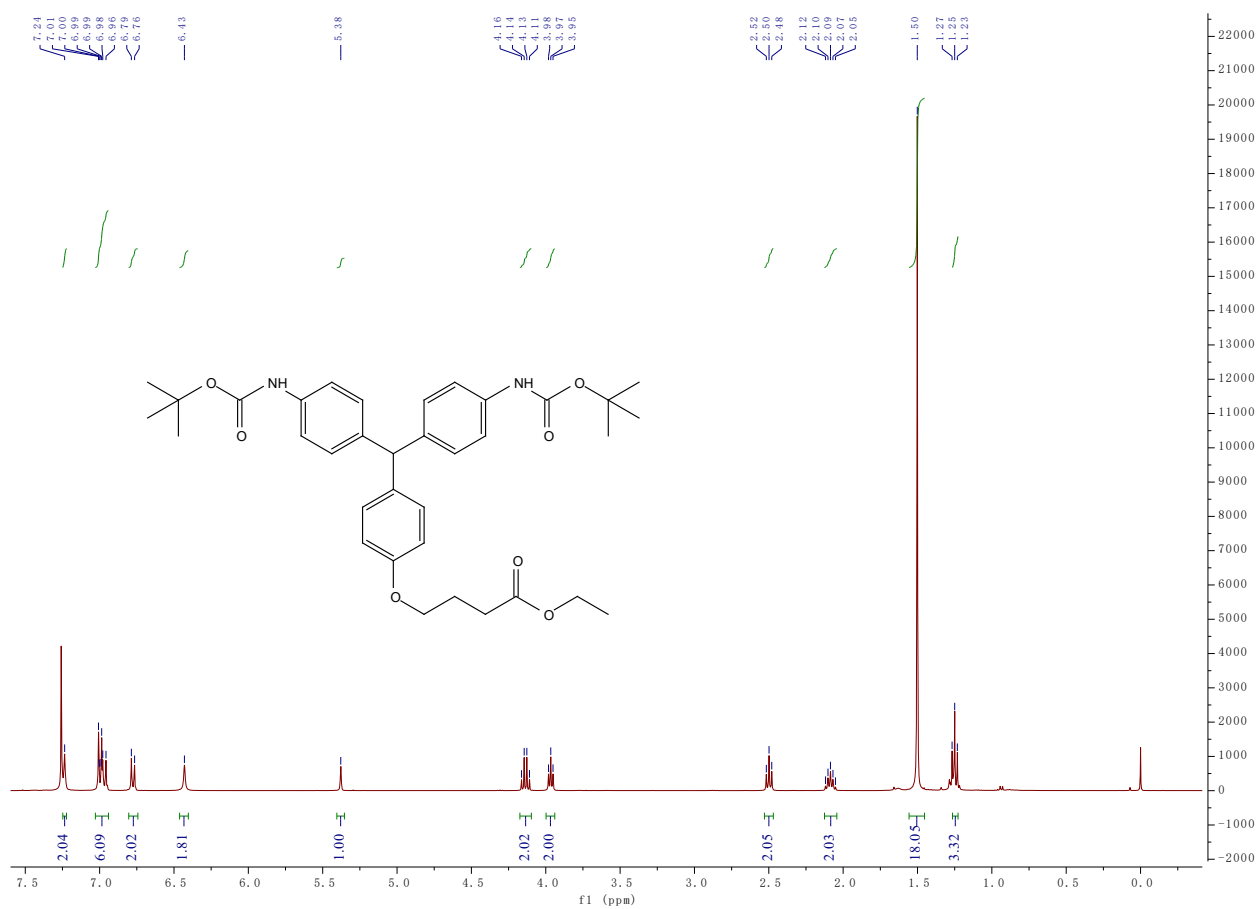

Figure S21. <sup>1</sup>H NMR spectrum of **6** in CDCl<sub>3</sub>.

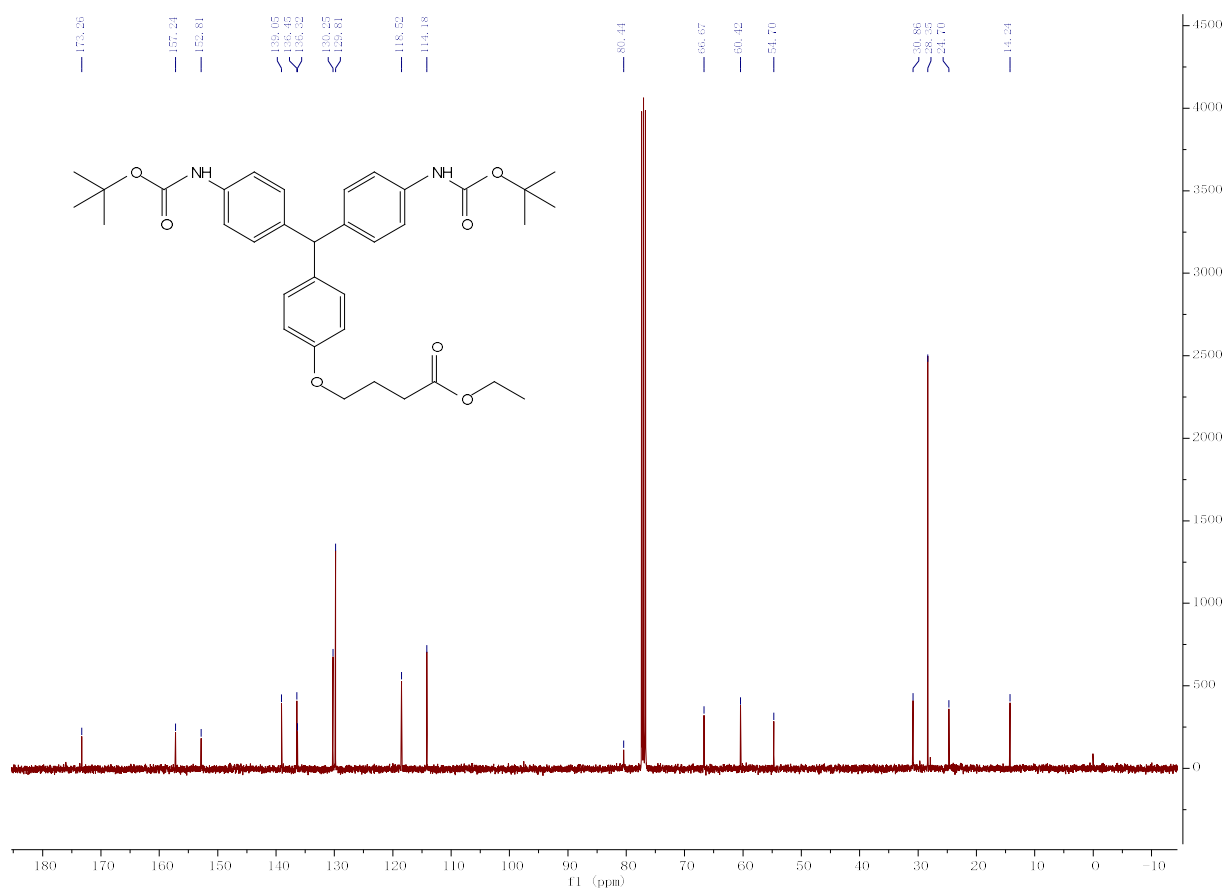

Figure S22. <sup>1</sup>H NMR spectrum of **6** in CDCl<sub>3</sub>.

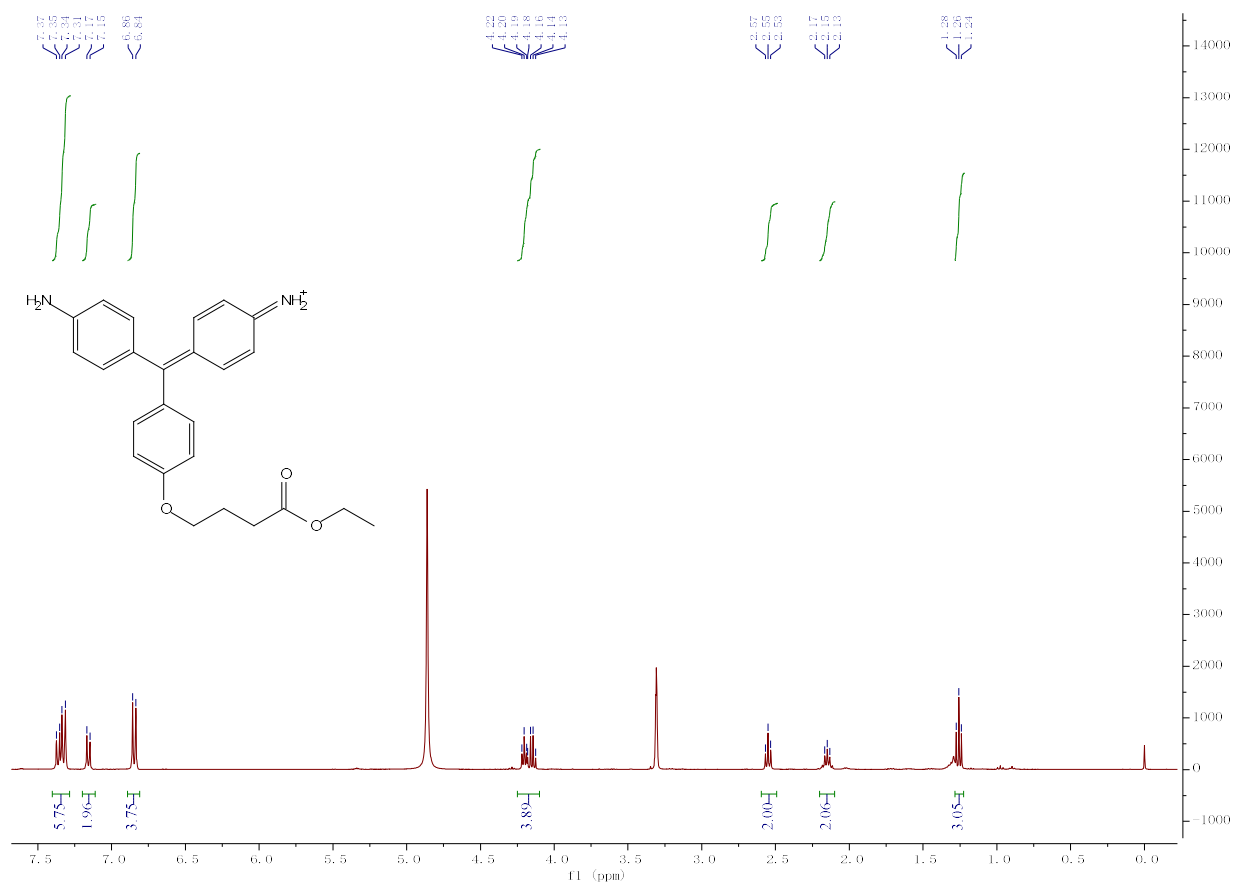

Figure S23. <sup>1</sup>H NMR spectrum of **MG2** in CD<sub>3</sub>OD.

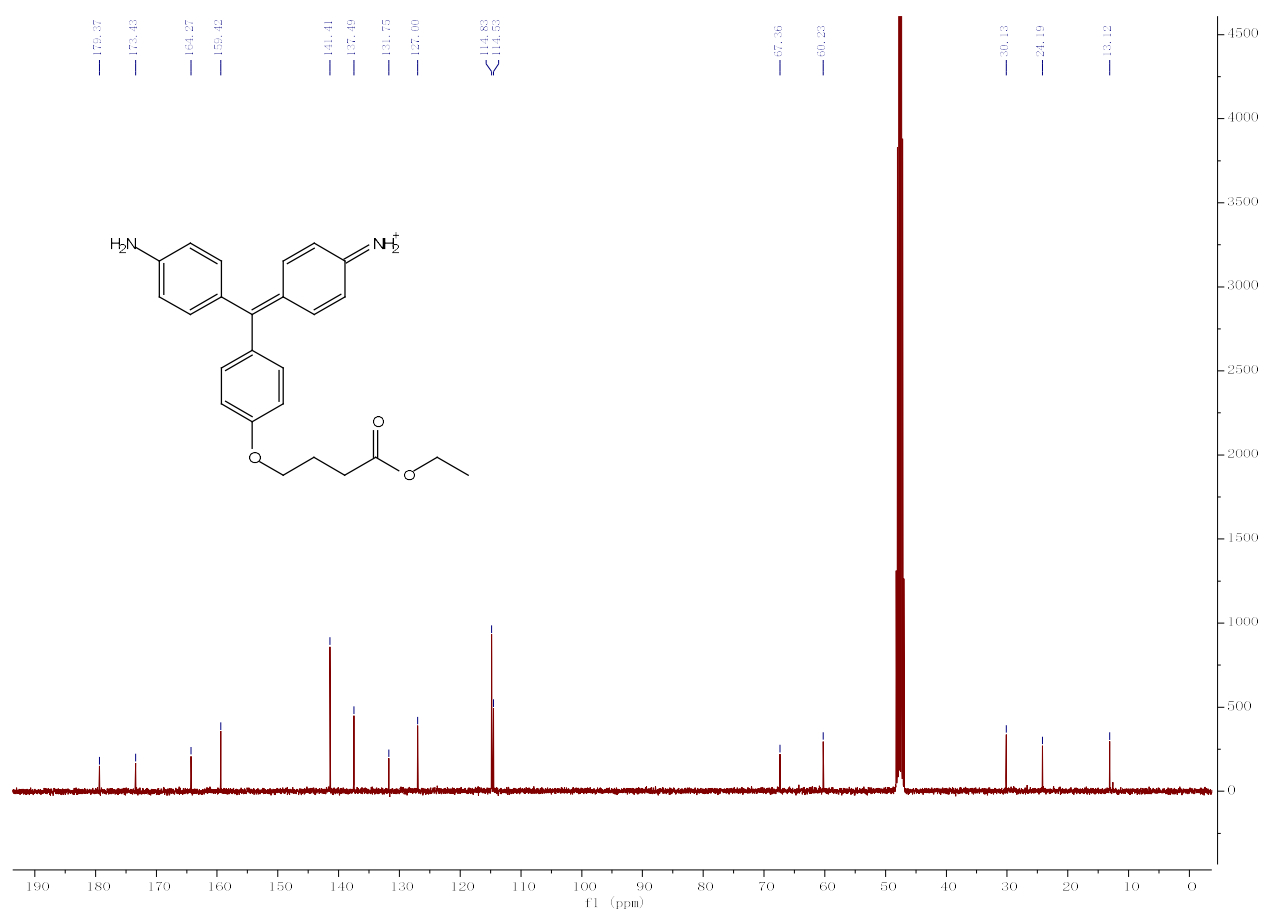

Figure S24. <sup>13</sup>C NMR spectrum of **MG2** in CD<sub>3</sub>OD.

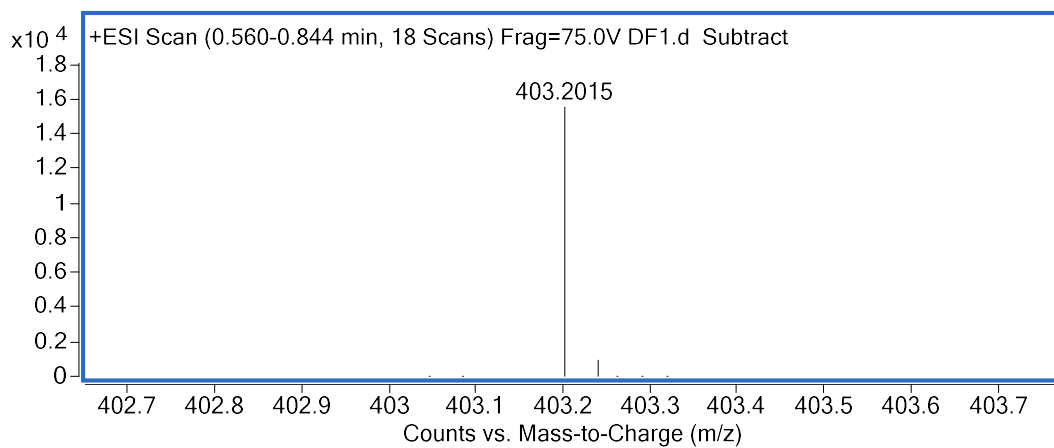

Figure S25. HRMS spectrum of **MG2**.



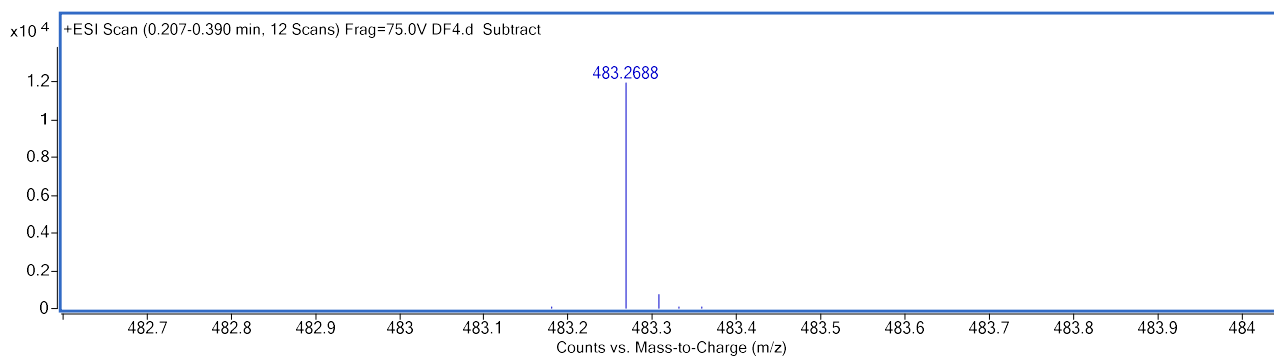

Figure S28. HRMS spectrum of **MG3**.

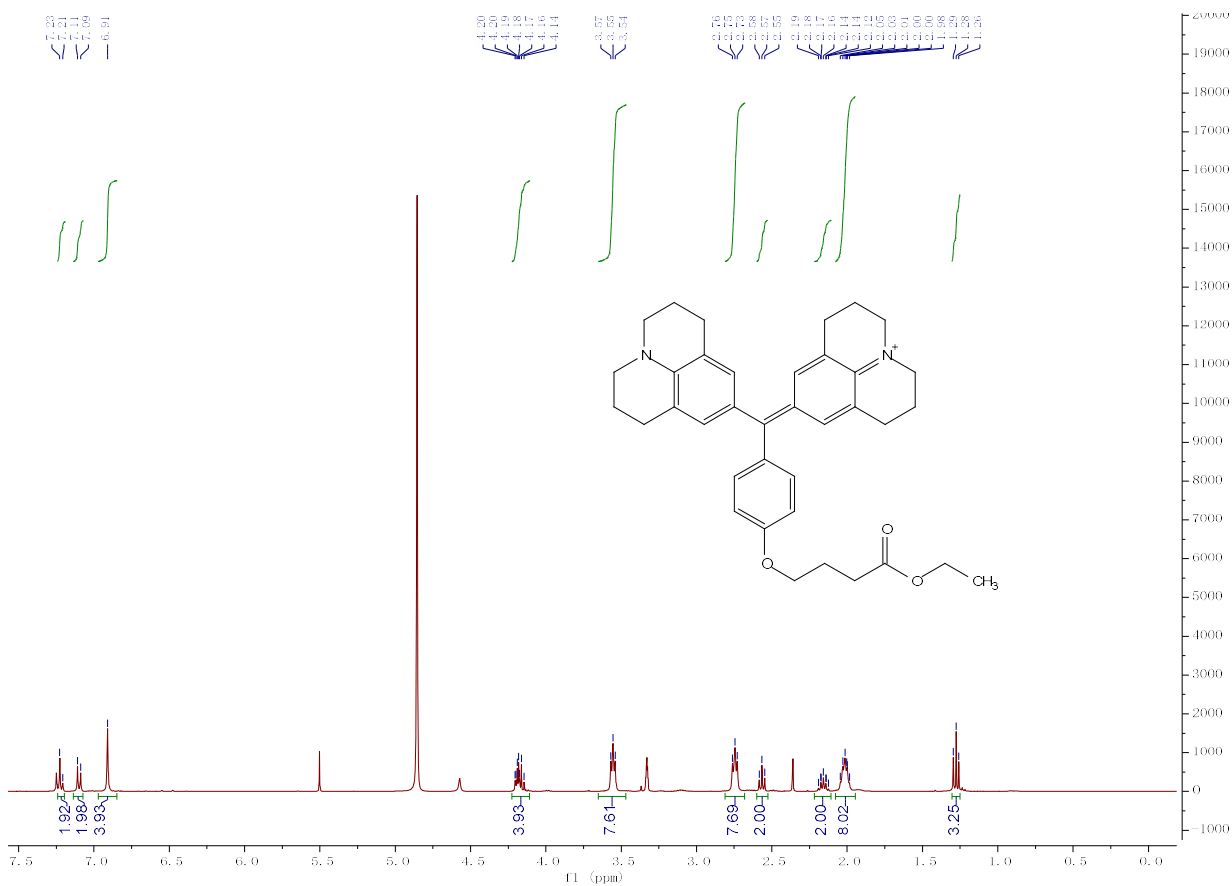

Figure S29.  $^1\text{H}$  NMR spectrum of **MG4** in  $\text{CD}_3\text{OD}$ .

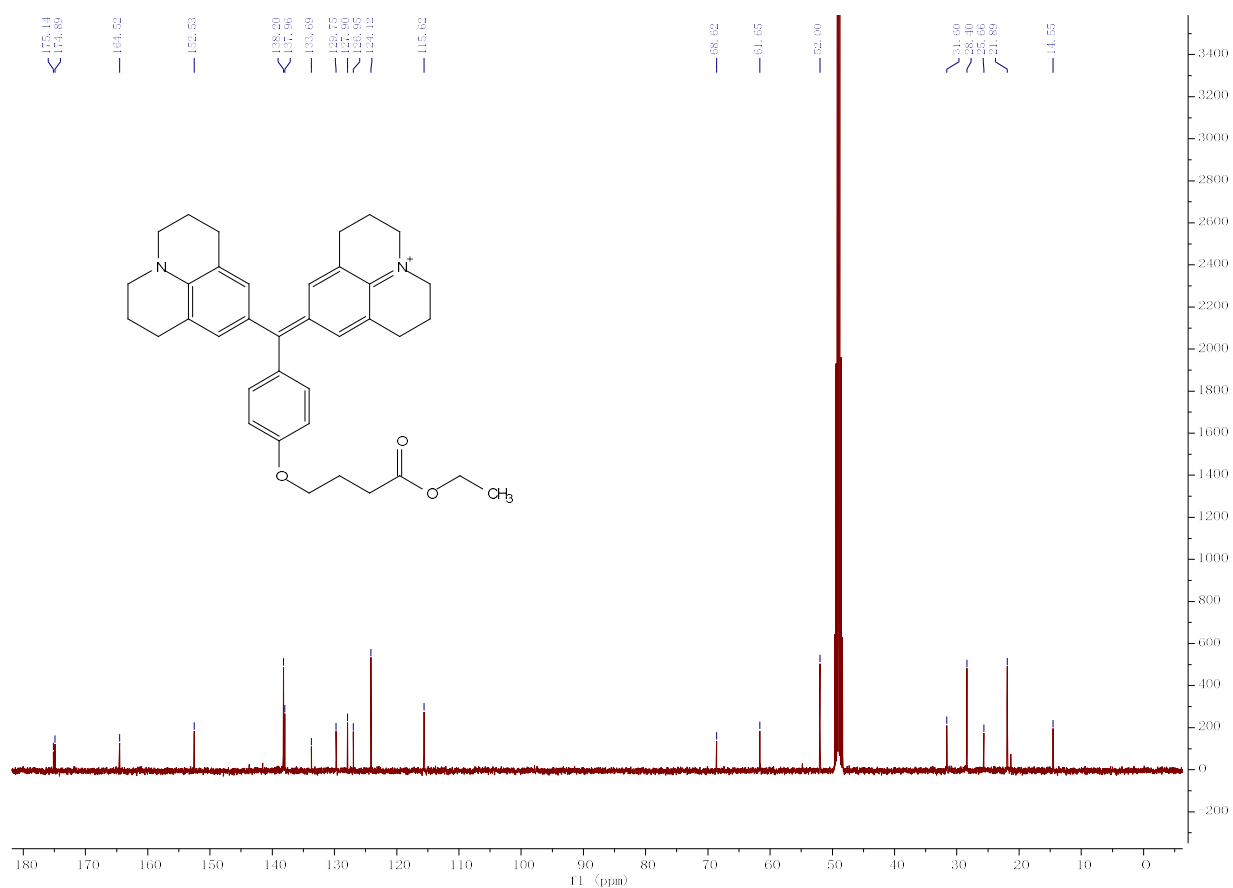

Figure S30. <sup>13</sup>C NMR spectrum of **MG4** in CD<sub>3</sub>OD.

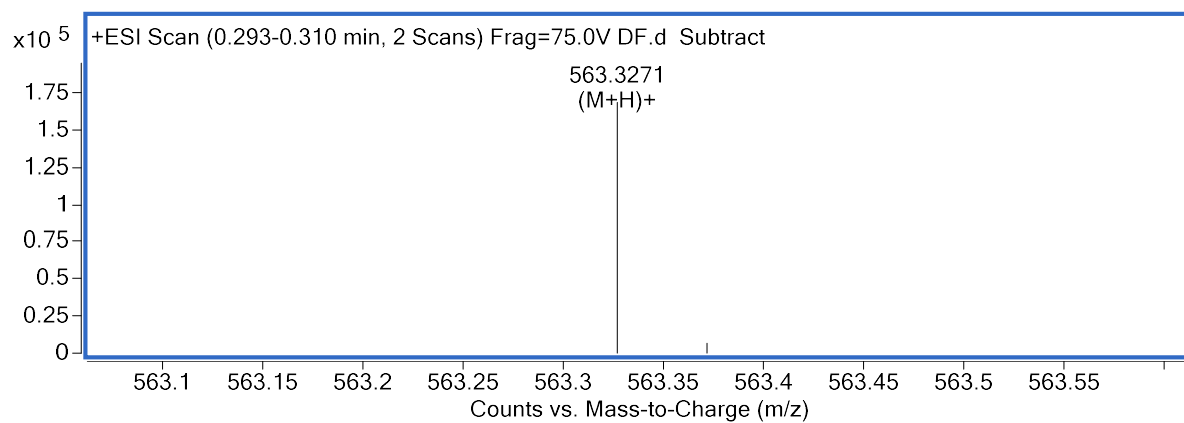

Figure S31. HRMS spectrum of **MG4**.

## References

1. G. Wang, T. Chen, T. Peng, S. Zhang, J. Wang, X. Wen, X. Yang and L. Wang, A Strategy To Prepare Peptide Heterodimers in the Solid Phase with an Acid-Labile Linker, *Org. Lett.*, 2019, **21**, 7351-7355.
2. C. Szent-Gyorgyi, B. A. Schmidt, Y. Creeger, G. W. Fisher, K. L. Zakel, S. Adler, J. A. J. Fitzpatrick, C. A. Woolford, Q. Yan, K. V. Vasilev, P. B. Berget, M. P. Bruchez, J. W. Jarvik and A. Waggoner, Fluorogen-activating single-chain antibodies for imaging cell surface proteins, *Nat. Biotechnol.*, 2008, **26**, 235-240.
3. J. B. Grimm, B. P. English, J. J. Chen, J. P. Slaughter, Z. J. Zhang, A. Revyakin, R. Patel, J. J. Macklin, D. Normanno, R. H. Singer, T. Lionnet and L. D. Lavis, A general method to improve fluorophores for live-cell and single-molecule microscopy, *Nat. Meth.*, 2015, **12**, 244-250.
4. F. Neese, The ORCA program system, *Wiley Interdiscip. Rev.: Comput. Mol. Sci.*, 2012, **2**, 73-78.
5. F. Neese, Software update: the ORCA program system, version 4.0, *WIREs Comput. Mol. Sci.*, 2018, **8**, e1327.
6. F. Neese, F. Wennmohs, U. Becker and C. Riplinger, The ORCA quantum chemistry program package, *The Journal of Chemical Physics*, 2020, **152**, 224108.
7. S. Grimme, A. Hansen, S. Ehlert and J.-M. Mewes, r2SCAN-3c: A "Swiss army knife" composite electronic-structure method, *The Journal of Chemical Physics*, 2021, **154**, 064103.
8. T. Lu and F. Chen, Multiwfn: a multifunctional wavefunction analyzer, *J. Comput. Chem.*, 2012, **33**, 580-592.
9. W. Humphrey, A. Dalke and K. Schulten, VMD: visual molecular dynamics, *J Mol Graph*, 1996, **14**, 33-38.
10. A. Waterhouse, M. Bertoni, S. Bienert, G. Studer, G. Tauriello, R. Gumienny, F. T. Heer, T. A. P. de Beer, C. Rempfer and L. Bordoli, SWISS-MODEL: homology modelling of protein structures and complexes, *Nucleic Acids Res.*, 2018, **46**, W296-W303.
11. O. Trott and A. J. Olson, AutoDock Vina: improving the speed and accuracy of docking with a new scoring function, efficient optimization, and multithreading, *J. Comput. Chem.*, 2010, **31**, 455-461.
12. W. L. DeLano, Pymol: An open-source molecular graphics tool, *CCP4 Newsl. Protein Crystallogr*, 2002, **40**, 82-92.
